# Supplementary material for: Determining barriers and facilitators to engagement for families in a family-based, multicomponent healthy lifestyles intervention for children and adolescents: a qualitative study
Source: PubMed Central journal article supplement — BMJ Open. 2020 Sep 6;10(9):e037152. doi: 10.1136/bmjopen-2020-037152 (PMC7478027; doi:10.1136/bmjopen-2020-037152), 2020-09-06
Supplement: bmjopen-2020-037152.draft_revisions.pdf [file bmjopen-2020-037152.draft_revisions.pdf]

# BMJ Open

BMJ Open is committed to open peer review. As part of this commitment we make the peer review history of every article we publish publicly available.

When an article is published we post the peer reviewers' comments and the authors' responses online. We also post the versions of the paper that were used during peer review. These are the versions that the peer review comments apply to.

The versions of the paper that follow are the versions that were submitted during the peer review process. They are not the versions of record or the final published versions. They should not be cited or distributed as the published version of this manuscript.

BMJ Open is an open access journal and the full, final, typeset and author-corrected version of record of the manuscript is available on our site with no access controls, subscription charges or pay-per-view fees (<http://bmjopen.bmj.com>).

If you have any questions on BMJ Open's open peer review process please email [info.bmjopen@bmj.com](mailto:info.bmjopen@bmj.com)

# BMJ Open

## Determining barriers and facilitators to engagement for families in a family-based multicomponent healthy lifestyles intervention for children and adolescents: a qualitative study

|                               |                                                                                                                                                                                                                                                                                                                                                                                                                              |
|-------------------------------|------------------------------------------------------------------------------------------------------------------------------------------------------------------------------------------------------------------------------------------------------------------------------------------------------------------------------------------------------------------------------------------------------------------------------|
| Journal:                      | <i>BMJ Open</i>                                                                                                                                                                                                                                                                                                                                                                                                              |
| Manuscript ID                 | bmjopen-2020-037152                                                                                                                                                                                                                                                                                                                                                                                                          |
| Article Type:                 | Original research                                                                                                                                                                                                                                                                                                                                                                                                            |
| Date Submitted by the Author: | 22-Jan-2020                                                                                                                                                                                                                                                                                                                                                                                                                  |
| Complete List of Authors:     | Wild, Cervantée; The University of Auckland Liggins Institute, Rawiri, Ngauru; The University of Auckland Liggins Institute<br>Willing, Esther; University of Otago, Kōhatu – Centre for Hauora Māori<br>Hofman, Paul; The University of Auckland Liggins Institute; Starship Children's Health<br>Anderson, Yvonne; The University of Auckland Liggins Institute; Taranaki District Health Board, Department of Paediatrics |
| Keywords:                     | PAEDIATRICS, Community child health < PAEDIATRICS, QUALITATIVE RESEARCH                                                                                                                                                                                                                                                                                                                                                      |
|                               |                                                                                                                                                                                                                                                                                                                                                                                                                              |

SCHOLARONE™  
Manuscripts

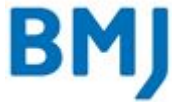

I, the Submitting Author has the right to grant and does grant on behalf of all authors of the Work (as defined in the below author licence), an exclusive licence and/or a non-exclusive licence for contributions from authors who are: i) UK Crown employees; ii) where BMJ has agreed a CC-BY licence shall apply, and/or iii) in accordance with the terms applicable for US Federal Government officers or employees acting as part of their official duties; on a worldwide, perpetual, irrevocable, royalty-free basis to BMJ Publishing Group Ltd ("BMJ") its licensees and where the relevant Journal is co-owned by BMJ to the co-owners of the Journal, to publish the Work in this journal and any other BMJ products and to exploit all rights, as set out in our [licence](#).

The Submitting Author accepts and understands that any supply made under these terms is made by BMJ to the Submitting Author unless you are acting as an employee on behalf of your employer or a postgraduate student of an affiliated institution which is paying any applicable article publishing charge ("APC") for Open Access articles. Where the Submitting Author wishes to make the Work available on an Open Access basis (and intends to pay the relevant APC), the terms of reuse of such Open Access shall be governed by a Creative Commons licence – details of these licences and which [Creative Commons](#) licence will apply to this Work are set out in our licence referred to above.

Other than as permitted in any relevant BMJ Author's Self Archiving Policies, I confirm this Work has not been accepted for publication elsewhere, is not being considered for publication elsewhere and does not duplicate material already published. I confirm all authors consent to publication of this Work and authorise the granting of this licence.

1  
2  
3 **Determining barriers and facilitators to engagement for families in a family-based**  
4 **multicomponent healthy lifestyles intervention for children and adolescents: a qualitative study**  
5  
6

7  
8 Cervantée EK Wild, Ngauru Rawiri, Esther J Willing, Paul L Hofman, Yvonne C Anderson  
9

10  
11 **Author addresses and positions**  
12

13  
14 Cervantée Wild  
15

16 Liggins Institute, University of Auckland, 85 Park Road, Grafton, Auckland 1023, New Zealand.  
17

18  
19 [cervantee.wild@auckland.ac.nz](mailto:cervantee.wild@auckland.ac.nz)  
20

21  
22 [cervantee.wild@tdhb.org.nz](mailto:cervantee.wild@tdhb.org.nz)  
23

24  
25 PhD candidate  
26  
27  
28  
29

30  
31 Ngauru Rawiri  
32

33 Liggins Institute, University of Auckland, 85 Park Road, Grafton, Auckland 1023, New Zealand.  
34

35  
36 [nanurawiri@gmail.com](mailto:nanurawiri@gmail.com)  
37

38  
39 Interview facilitator  
40  
41  
42  
43

44  
45 Esther J Willing  
46

47 Kōhatu – Centre for Hauora Māori, University of Otago, 362 Leith Street, North Dunedin, Dunedin  
48  
49 9016, New Zealand.  
50

51  
52 [esther.willing@otgao.ac.nz](mailto:esther.willing@otgao.ac.nz)  
53

54  
55 Lecturer  
56  
57  
58  
59

60  
61 Paul L Hofman

1  
2  
3 Liggins Institute, University of Auckland, 85 Park Road, Grafton, Auckland 1023, New Zealand.  
4  
5

6 Professor  
7

8 Starship Children's Hospital, Auckland District Health Board, 2 Park Road, Grafton, Auckland 1023,  
9  
10 New Zealand.  
11

12  
13 [p.hofman@auckland.ac.nz](mailto:p.hofman@auckland.ac.nz)  
14  
15

16 Paediatric endocrinologist  
17  
18

19  
20  
21  
22 Yvonne C Anderson  
23

24 Liggins Institute, University of Auckland, 85 Park Road, Grafton, Auckland 1023, New Zealand.  
25  
26

27 Senior Research Fellow  
28

29  
30 Department of Paediatrics, Taranaki District Health Board, David Street, Westown, New Plymouth  
31  
32 4310, New Zealand.  
33

34  
35 [yvonne.anderson@tdhb.org.nz](mailto:yvonne.anderson@tdhb.org.nz)  
36  
37

38 [y.anderson@auckland.ac.nz](mailto:y.anderson@auckland.ac.nz)  
39  
40

41 Paediatrician  
42  
43  
44  
45

46 **Correspondence to:**  
47

48 Dr Yvonne Anderson  
49

50  
51 Department of Paediatrics  
52

53  
54 Taranaki District Health Board  
55

56  
57 David Street  
58

59  
60 Westown

1  
2  
3 New Plymouth 4310  
4

5  
6 New Zealand  
7

8  
9 [yvonne.anderson@tdhb.org.nz](mailto:yvonne.anderson@tdhb.org.nz)  
10

11  
12 +64 6 7536139  
13

14 *The Corresponding Author has the right to grant on behalf of all authors and does grant on behalf of*  
15 *all authors, an exclusive licence (or non exclusive for government employees) on a worldwide basis to*  
16 *the BMJ Publishing Group Ltd to permit this article (if accepted) to be published in BMJ editions and*  
17 *any other BMJ PGL products and sublicences such use and exploit all subsidiary rights, as set out in*  
18 *our licence.*  
19  
20  
21  
22  
23  
24  
25  
26  
27  
28  
29  
30  
31  
32  
33  
34  
35  
36  
37  
38  
39  
40  
41  
42  
43  
44  
45  
46  
47  
48  
49  
50  
51  
52  
53  
54  
55  
56  
57  
58  
59  
60

## ABSTRACT

**Objectives:** Recruitment and retention in child and adolescent healthy lifestyle intervention services for childhood obesity is challenging, and inequalities across social groups are persistent. This study aimed to understand the barriers and facilitators to engagement in a multicomponent assessment-and-intervention healthy lifestyle programme for children and their families, based in the home and community.

**Design:** Qualitative interview-based study of past users of a family-based multicomponent healthy lifestyle programme in a mixed urban-rural region of New Zealand. Semi-structured, home-based interviews were conducted and thematically analysed with peer debriefing for validity.

**Participants:** Families were selected through stratified random sampling to include a range of levels of engagement, including those who declined their referral, with equal numbers of interviews with Indigenous and non-Indigenous families.

**Results:** Three interactive and compounding determinants were identified as influencing engagement in Whānau Pakari: acute and chronic life stressors, societal norms of weight and body size, and historical experiences of healthcare. These determinants were present across societal, system and healthcare service levels. A negative referral experience to Whānau Pakari often resulted in participants declining further input or disengaging from the programme. A fourth domain, respectful and compassionate healthcare, was identified as a mitigator these three themes, facilitating participant engagement despite previous negative experiences.

**Conclusions:** While participant engagement in healthy lifestyle programmes is affected by determinants which appear to operate outside immediate service provision, the programme is an opportunity to acknowledge past instances of stigma and the wider challenges of healthy lifestyle change. The experience of the referral to Whānau Pakari is important for setting the scene for future engagement in the programme. Respectful, compassionate care is critical to enhanced retention in multidisciplinary healthy lifestyle programmes and ongoing engagement in healthcare services overall.

### Strengths and limitations of this study

- Large sample size (64 interviews)
- Sample included wide range of participants with varying levels of engagement, including non-service users
- Equal representation from families with Māori and non-Māori children
- Lack of child and adolescent voice
- Participants may not have fully disclosed their experiences to interviewers

### Introduction

Excess weight in childhood and adolescence affects physical, psychological and social health and well-being, and is a known risk factor for comorbidities both in childhood and adulthood.<sup>1</sup> Children with weight issues in Aotearoa/New Zealand (henceforth referred to as New Zealand) demonstrate a high prevalence of weight-related comorbidities, as well as low physical activity, suboptimal eating behaviours, and low health-related quality of life.<sup>2-5</sup> One of the key recommendations of the World Health Organization's Report of the Commission on Ending Childhood Obesity is to "provide family-based, multicomponent lifestyle weight management services for children and young people who are obese".<sup>6</sup> A systematic review and meta-analysis found that a minimum of 26 hours of contact time in lifestyle interventions is associated with improvements in weight status in children and adolescents.<sup>7</sup> However, as with any service attempting to facilitate lifestyle change, success relies on continued family engagement.<sup>8</sup> It is also important that such multidisciplinary services – and other health professionals addressing childhood obesity in a primary care setting – are able to engage with groups most affected by obesity, namely those living in the most deprived areas and ethnic minorities.<sup>9</sup>

Improving *engagement* with childhood obesity services requires addressing both initial recruitment and ongoing retention.<sup>8</sup> Service, system and society-related factors may *enable* or *inhibit* initial and ongoing engagement; factors which are also referred to as facilitators and barriers.<sup>10, 11</sup> Kelleher and



1  
2  
3 colleagues' review of the factors affecting attendance at community-based lifestyle programmes  
4  
5 found that weight stigma, parental reluctance to identify overweight and logistical challenges were  
6  
7 key barriers to initial and ongoing attendance.<sup>10</sup> Under-represented in the literature are those who  
8  
9 declined treatment altogether, as many past studies had low recruitment from these families. It is  
10  
11 therefore important to understand the experiences of families experiencing childhood obesity in order  
12  
13 to improve initial recruitment and ongoing retention in healthy lifestyle services, particularly for  
14  
15 groups most affected.<sup>10</sup>  
16  
17

18 Whānau Pakari is a family-centred, community-based assessment and intervention programme for  
19  
20 children and their families, based in Taranaki, a mixed urban-rural region of New Zealand (NZ). The  
21  
22 name means 'healthy, self-assured families that are fully active'. The focus of the programme is on  
23  
24 healthy lifestyle change rather than weight loss or obesity, in order to minimise judgement and  
25  
26 weight-related stigma. The multidisciplinary service involves a home-based medical assessment with  
27  
28 advice, removing the hospital appointment in order to *demedicalise* care, and includes weekly  
29  
30 nutrition, physical activity and psychology sessions. This approach takes healthcare outside hospital  
31  
32 walls and into the community, without compromising quality of care. A randomised clinical trial of  
33  
34 the Whānau Pakari model of care demonstrated modest reductions in body mass index (BMI) standard  
35  
36 deviation score (SDS) and improvements in cardiovascular fitness and health-related quality of life.<sup>12</sup>  
37  
38 <sup>13</sup> Greatest improvements in BMI SDS were found in those who attended the recommended  $\geq 70\%$  of  
39  
40 intense intervention sessions.<sup>13</sup> However, Māori (NZ's Indigenous population) and females were less  
41  
42 likely to attend  $\geq 70\%$  of sessions, with sustained retention in the programme favouring males and NZ  
43  
44 Europeans.<sup>13</sup>  
45  
46  
47

48 Previous evaluation of the experiences of Whānau Pakari participants and their caregivers has shown  
49  
50 the programme to be a positive and beneficial experience for those involved, emphasising the  
51  
52 importance of connectedness, knowledge-sharing and self-determination, the collective journey  
53  
54 alongside other families and programme deliverers, and the importance of a non-judgemental,  
55  
56 respectful environment.<sup>14</sup> However, a survey of past participants of Whānau Pakari indicated that  
57  
58 previous experiences of healthcare may influence subsequent engagement with health services,  
59  
60

1  
2  
3 particularly for Māori.<sup>15</sup> Therefore, the objective of this study was to understand barriers and  
4  
5 facilitators to initial attendance and ongoing retention in the Whānau Pakari programme.  
6  
7

## 8 *Methods*

### 9 *Design*

10  
11 In NZ, health research is required to be responsive to the needs and diversity of Māori.<sup>16</sup> The study  
12  
13 design and research approach was informed by Kaupapa Māori theory, which resists persistent power  
14  
15 imbalances and the continued use of cultural deficit theory (attributing poor health to something  
16  
17 inherent to a ‘culture’) to explain inequities between Māori and non-Māori.<sup>16, 17</sup> Kaupapa Māori  
18  
19 research is an approach which centres Māori voice and experience and is aligned with a social and  
20  
21 structural determinants of health framework.<sup>18</sup> Subsequently, priority was given to ensuring the voices  
22  
23 and experiences of Māori participants were understood in this study. In-depth interviews, centring on  
24  
25 participant experience with Whānau Pakari and wider experiences of the health system, were  
26  
27 undertaken. A specific focus was to understand the barriers to attendance and retention at varying  
28  
29 levels of engagement in Whānau Pakari, including those who declined their referral and had no  
30  
31 further contact with the programme. Factors which facilitated both initial and ongoing engagement  
32  
33 were explored.  
34  
35  
36  
37

38  
39 Ethical approval for the Whānau Pakari Barriers and Facilitators study was granted by Central Health  
40  
41 and Disability Ethics Committee (NZ) (17/CEN/158/AM01). Written informed consent was obtained  
42  
43 from all study participants.  
44  
45

### 46 *Participants*

47  
48 Eligible participants were parents and/or caregivers of children and adolescents who had been referred  
49  
50 to the service from January 2012 to January 2017. Children and adolescents over 11 years of age were  
51  
52 also invited to participate. The eligibility criteria for referral to the service are children aged 4 to 16  
53  
54 years, identified as having obesity [body mass index (BMI)  $\geq 98^{\text{th}}$  centile], or overweight (BMI  $> 91^{\text{st}}$   
55  
56 centile) with associated weight-related comorbidities.<sup>12, 19</sup>  
57  
58  
59  
60

1  
2  
3 Participants were recruited from four different groups of Whānau Pakari service users who had  
4 varying levels of engagement (table 1) using stratified random sampling. Recruitment was via  
5 telephone call and text message. The sample contained equal numbers of families with Māori and  
6 non-Māori children to ensure appropriate representation of Indigenous children's experiences.  
7  
8  
9

10  
11  
12 The interviews were conducted by CW and NR together where possible. NR led the interviews with  
13 Māori families when appropriate. Interviews took place in the participant home or alternative  
14 locations chosen by the participant (including a hospital, participant workplaces, and a community  
15 library) in order to minimise inconvenience and travel barriers. A *koha* (gift, donation or contribution)  
16 was offered to participants in acknowledgement of their time and as a sign of reciprocity for the  
17 information shared.  
18  
19  
20  
21  
22  
23  
24

#### 25 *Data collection*

26  
27 Informed consent was obtained to record, transcribe and analyse participant data. All participant  
28 information was anonymised. Participant ethnicity for both the parent/caregiver and child was  
29 confirmed at the time of the interview by using the NZ Census 2006 ethnicity question.<sup>20</sup> All  
30 interviews were audio-recorded and independently transcribed. Participants were offered their  
31 transcripts to review for accuracy and acceptability.  
32  
33  
34  
35  
36  
37  
38

#### 39 *Analysis*

40  
41 Interview transcripts were coded and analysed thematically in MAXQDA.<sup>21</sup> CW developed the  
42 coding matrix with peer review from EW, coded the interview data, and identified the initial themes.  
43  
44 The authors collaborated to finalise the themes and develop the framework. The acknowledgement of  
45 different researcher standpoints allowed the authors to debate, challenge, and refine interpretations of  
46 the data. Specifically, the researchers agreed to apply the 'Give-Way' rule if there was disagreement  
47 over the interpretation of the data concerning Māori participants, with the final decision involving  
48 cultural interpretation of Māori participants' experiences passing to a Māori researcher.<sup>18, 22, 23</sup>  
49  
50  
51  
52  
53  
54  
55

56 For more detail of this procedure, please refer to the Consolidated Criteria for Reporting Qualitative  
57 Research (COREQ) checklist (Appendix One).  
58  
59  
60

### *Patient and Public Involvement statement*

Participants were first involved in the research at the recruitment stage, although some participants had been involved in an earlier related randomised clinical trial.<sup>12</sup> The research questions were informed by the experiences of participants voiced during clinical assessment and in previous focus group research.<sup>14</sup> The design of the research drew from Kaupapa Māori theory, which informed the research process in order to prioritise the experiences and preferences of participants. The dissemination process to participants was altered as a result of participant preference to receive feedback via a summary video, rather than at a group meeting. Participants were not asked to assess the burden of the time required to participate in the research.

### Results

Sixty-four interviews were conducted (out of a potential cohort of 74) with families who had varying levels of engagement, across a six-month period from June to November 2018 (76 participants in total) (Table One). Half of the interviews were with Māori families (families with a Māori child who had been referred to the service), including interviews with non-Māori parents of a Māori child. Full details of interview recruitment rate and reasons for non-participation are included in the COREQ checklist (Appendix One).

### *Demographics*

Table 1. Participant demographics

|                              |                                     |     |
|------------------------------|-------------------------------------|-----|
| Interview participants N     |                                     | 76* |
| Female participant <i>n</i>  |                                     | 65  |
| Ethnicity %†                 | Māori                               | 32  |
|                              | NZ European                         | 75  |
|                              | Asian                               | 7   |
|                              | Other European                      | 5   |
| Level of engagement <i>n</i> | Attended ≥70% of programme sessions | 18  |

|    |                                       |    |
|----|---------------------------------------|----|
| 1  |                                       |    |
| 2  |                                       |    |
| 3  | Attended <30% of programme            | 19 |
| 4  |                                       |    |
| 5  | sessions                              |    |
| 6  |                                       |    |
| 7  | Had one assessment, then discontinued | 7  |
| 8  |                                       |    |
| 9  | with the program                      |    |
| 10 |                                       |    |
| 11 | Referred, but chose not to engage     | 20 |
| 12 |                                       |    |
| 13 |                                       |    |
| 14 |                                       |    |
| 15 |                                       |    |

\*64 interviews total, 11 interviews involved 2+ family members. †Total ethnicity output (more than one ethnicity selected)

### Panel 1: Key determinants of engagement and retention in Whānau Pakari

#### Domain 1: Adverse life stressors & socioeconomic deprivation

‘I wouldn’t say it was, like, you guys as such – it was just the history behind what she had um, but we come from, so um I came from an abusive marriage, which had split up because of abuse... So this was really hard at the time.’

‘Once she lost her father, well that was pretty much the end of it. She just didn’t want to do nothing. As much as I tried to encourage her to, you know, get with the programme, no she just didn’t want to know about it.’

#### *Competing health priorities*

‘...[DAUGHTER] was under [child and adolescent mental health services] for suicide watch and stuff like that... so for us there was that added stuff as well.’

#### *Financial insecurity/socioeconomic status*

‘I didn’t have a house and lived in that camper. Yeah, so it just didn’t work out, otherwise she would have

gone.’

## **Domain 2: Societal norms of weight and body size**

### ***Age***

‘Like, a weight problem, like, at the time he was only 6 years or 7 years.’

‘... we were kind of shocked because they said that [SON] was, like, obese or something ... I don’t think he’s overweight at all... Because he’s really tall... so I don’t understand, like, what sort of weight should he have been because he was, he’s just like a, he was like a normal kid. So I don’t understand what is overweight and underweight. Because I’ve seen some, not being mean, but overweight kids, and he wasn’t overweight.’

### ***Gender***

‘She might develop an eating disorder and I don’t want that. I’d rather, you know, it’s weird, but I’d rather she be overweight than underweight, you know what I mean? I’d hate to deal with an anorexic daughter because that’s hard work.’

### ***Genetic disposition***

‘You know... it’s just the way it is sometimes. Some people get good genes, some people get other genes and it means it doesn’t work out.’

## **Domain 3: Historical experiences of healthcare**

### ***Weight stigma and discrimination***

‘... having visited for something else entirely different and then being told kind of ‘your child’s obese and we are going to refer you’ and just doing it front of him [...] it was just even in the way that it was delivered and I was kind of not expecting it. I mean, I can see that he’s, he’s a bit chunky, but I just, I don’t know [...] [the referral] was a bit off-putting.’

**Racism**

‘...people will judge you for what and where, what colour you are or whatever... [it] just made me more determined to get in there and do what I had to do.’

**Mediator 1: Respectful, compassionate care mitigated past experiences**

‘It was not just the families, but also the, what do you call them, the workers... Very supportive, non-judgmental. I think that made a big difference and ‘yes we are going to go’ because they are not judging you... the staff was very supportive.’

Three major domains and subthemes affecting participant engagement are described in panel 1 in participants’ own words. A fourth domain of respectful, compassionate care was identified as a mediator, which was able to mitigate the effect of the first three themes.

*Domain 1: Obesity sits within the context of multiple other complex stressors for families in NZ*

Participation in the Whānau Pakari service was affected by the multiple complex stressors of living in contemporary New Zealand. These were acute, one-off adverse events, such as a death in the family, and chronic, ongoing challenges, such as financial insecurity. Childhood obesity and overweight as a health concern sat within the context of multiple other important concerns for families. Participants were often living in ‘crisis mode’ or dealing with multiple challenges at once, including: financial and food insecurity, suicide, abusive relationships, deaths in the family, mental health issues, disability, relocation, marriage & family break-ups, fostering children, children being raised by other caregivers, drug use and significant other illnesses.

For parents of children with multiple health conditions, especially mental health concerns or autism spectrum disorder, addressing weight was often not perceived to be as important compared with other competing family health concerns. Parents and caregivers also reported the challenges of balancing multiple demands such as long work hours, shift work and extracurricular activities alongside attending Whānau Pakari.

1  
2  
3 'I think he had one of his sporting things on and I was doing 50 hours a week at that time and  
4 I was like 'oh, my God, I can't do it', I couldn't do it. I mean, if he needed, if I felt like he  
5 needed to be there, I would get him there, like, it's, my work's not that important. Weeds and  
6 shit can wait, you know, like, people can wait um if it was a, if I felt like it was serious. I  
7 would have got him there, but I just yeah.'

8  
9  
10  
11  
12  
13 Similarly, socioeconomic deprivation and food insecurity was perceived to be a more immediate and  
14 pressing concern than childhood overweight or obesity. Both initial attendance and ongoing retention  
15 were affected by a lack of participant resources, even if participants expressed a desire to attend.  
16 Participants who engaged with Whānau Pakari and other services despite the impact of adverse  
17 stressors appeared to have more resources.

18  
19  
20  
21  
22  
23  
24  
25 *Domain 2: Societal norms of weight and body size affect how people experience seeking care for*  
26 *weight*

27  
28  
29  
30 *Age*

31  
32 The age of the child involved in the service affected the degree to which families chose to engage, due  
33 to a perception that children were too young to have weight problems, which was a key reason for  
34 both dropping out of the service early or declining input altogether. Children who were clinically  
35 overweight or had obesity were perceived to be a normal weight in early childhood and increasingly  
36 beyond. Some participants felt that while their child might not fit into a set of assessment criteria, this  
37 did not necessarily equate to their child being unhealthy.

38  
39  
40  
41  
42  
43  
44  
45  
46 'When he got put in the [...] 'oh, he's overweight' box. And when you're, like, 'he's not that  
47 overweight', because it was just he wasn't in their little boxes. I think that more annoyed me,  
48 is that they've got these sort of, like, 'this is the normal weight for a 5 year old'. Well, there's  
49 all sorts of different 5 year olds. He's now 10 years and he is my height [...] he's a big guy.'

50  
51  
52  
53  
54  
55 There was a strong belief that if children were 'big but active', then their weight was not a concern.



1  
2  
3           ‘...he’s always been big, but he’s really active. Like he wins the triathlons and the cross-  
4  
5           country and he bikes and swims... it’s not like he can’t exercise or is held up, you know what  
6  
7           I mean? And so we just thought well, and it’s not like he wasn’t healthy eating.’  
8  
9

### 10           *Gender*

11  
12  
13           Families appeared more reluctant to engage their female children in services that are characterised as  
14  
15           weight-related, both at initial recruitment and throughout the programme, for fear of their child  
16  
17           developing self-esteem issues. Parents also reported their daughters were often reluctant to attend  
18  
19           themselves.  
20

21  
22           ‘To me it’s like you don’t need to involve her because she’s already self-conscious, soft-  
23  
24           hearted, already upset about it sort of thing and, like, to me it was like more of a trigger. So, I  
25  
26           was, like, no. I will do it my way. So I pulled back because it wasn’t worth it for her, you  
27  
28           know what I mean? Like, her self-esteem and stuff is worth more than, you know, going to a  
29  
30           dietitian where at home I can just stop giving her all that stuff to make her healthier. So that’s  
31  
32           where it comes across wrong.’  
33  
34

### 35           *Genetics*

36  
37  
38           Overweight and obesity was often associated with genetics by participants. This was sometimes  
39  
40           specifically linked to ethnicity, and specifically that Māori and Pacific Island peoples are ‘naturally  
41  
42           big’. A familial propensity towards overweight resulted in participants reportedly acting in two ways:  
43  
44           either they did not want to engage because they felt that there was no point, given their weight was  
45  
46           genetic (panel 1), or they were compelled to engage more in order to counteract their genetics:  
47  
48

49           ‘My side of the family is really obese so weight has always been an issue, so if you are trying to  
50  
51           diet everyone gets behind you because they know what the challenge and the battle is. No, we  
52  
53           don’t really care what other people say, we just get on with it.’  
54  
55  
56  
57  
58  
59  
60

1  
2  
3 *Domain 3: Historical experiences of healthcare affect future perception and engagement with*  
4 *services*  
5

6  
7 Past experiences of healthcare influenced participants' opinions, perceptions and behaviour in relation  
8 to seeking care again. This was a multidimensional phenomenon, acting across both weight and  
9 ethnicity. If participants had had negative experiences in the health system in relation to their weight  
10 or ethnicity, then they were less willing to engage with Whānau Pakari and other health services. This  
11 was especially important if the referral experience to Whānau Pakari was negative, given that this  
12 may have been the first instance of being confronted about their child's weight.  
13  
14  
15  
16  
17  
18  
19

20  
21 'Basically they told her she was obese [at the B4 School Check] ... Yeah, that she was obese  
22 for her age and they said this in front of her, and she was like "what is obese"? And they said,  
23 "you're bigger than any other child your age" but she's not the only one [...] So they say it in  
24 front of a child, it sort of knocks their self-esteem and their confidence right back.'  
25  
26  
27  
28  
29

30 While weight stigma was experienced across all groups of participants, there were few feelings of  
31 stigma about attending Whānau Pakari for those participants who engaged highly ( $\geq 70\%$  of sessions):  
32  
33

34 'There was nothing to be embarrassed about. You know, like secretive about it. It was  
35 something that I was doing for my kid, to help her get better in herself and if someone else  
36 had a problem then that was their problem, not mine. At the end of the day it is about her. Not  
37 about what anyone else thought.'  
38  
39  
40  
41  
42  
43

44 Experiences of racism in the healthcare system and in wider society affected how participants  
45 reengaged with health services. This included a wide range of race-related experiences from  
46 interpersonal to institutionalised racism. Likewise, participants recounted a variety of responses to  
47 these experiences from renewal of engagement and wanting to 'prove them wrong', to disengagement  
48 with outside entities and organisations, to internalised racism.  
49  
50  
51  
52  
53

54 '... we have been through so much stigmatisation that nothing more than one thing matters  
55 [...] because for us it's about the betterment of our children and our whānau [family] as a  
56 unit.'  
57  
58  
59  
60

1  
2  
3 *Mediator 1: Respectful, compassionate care mitigated past experiences*  
4

5 Conversely, positive and respectful care received in both the Whānau Pakari programme and in other  
6 areas of the health system mitigated the effect of the first three determinants, particularly against the  
7 impact of past negative experiences of healthcare. A positive referral experience generally set a  
8 positive tone for interacting with the Whānau Pakari service itself.  
9  
10  
11  
12

13  
14 ‘So we decided yes, this would be an awesome programme for our daughter, because we  
15 wanted her to just have some stability at the time because she was just starting High School,  
16 going into a phase where people were judging and things like that, you know, building her  
17 self-esteem [...] It’s helped her with her confidence and just building a life that’s easy for her,  
18 you know. So, yeah, I thank [referrer] for that and for putting us onto that programme too  
19 because it was really awesome. We, as a whānau, we enjoyed it, and just being able to support  
20 her in that programme.’  
21  
22  
23  
24  
25  
26  
27  
28  
29

30 Participants who did engage with Whānau Pakari reported that the care received in the programme  
31 was ‘different’ from previous care received and that the programme deliverers were ‘like a family’.  
32 For these families, the respectful and compassionate care countered some of the negative effects of  
33 past experiences.  
34  
35  
36  
37  
38

39 ‘It was just the people, that’s all it was. It was just the approach of the people to be honest um  
40 and that made us comfortable, and I go by my children a lot because if they’re uncomfortable  
41 well then they’re not the right people to be around for us. And they were comfortable.’  
42  
43  
44  
45

46 The social and team aspects of Whānau Pakari were beneficial for families, as well as the perceived  
47 extra care received  
48  
49

50 ‘I liked it. I didn’t think I was going to. I thought ‘oh, this is going to be stupid’, but no it  
51 wasn’t. It was actually a bit of an eye opener. I actually learnt something. And then we just  
52 recently got her blood tests and all that done again because through the doctors they didn’t do  
53 no diabetic tests or anything like that. Through Whānau [Pakari] they did. They did heaps  
54  
55  
56  
57  
58  
59  
60

1  
2  
3 more than the doctors did. So I think that's pretty much why we stayed with them, it was like  
4  
5 'aha, we can get some serious help here'.  
6  
7

8 Figure One summarises the interacting and mitigating domains affecting participant engagement.  
9

## 10 11 Discussion 12 13 14 15

16 This study found that engagement in Whānau Pakari was determined by the degree to which  
17 participants were affected by three interactive domains: complex adverse life stressors, societal norms  
18 of weight and body size, and past experiences of healthcare. These complex mechanisms operated at  
19 multiple levels including at the service, health system and wider societal levels, so that experiences at  
20 the seemingly distal societal level could still have an impact on participant engagement at the service  
21 level. While the impact of these factors was evident across all four groups, some participants appeared  
22 to be resilient to the impact of these determinants. Additionally, respectful and compassionate care  
23 appeared to act as a positive mediator. Conversely, participants who declined further input after their  
24 referral were more likely to be experiencing greater life stressors without the resources to overcome  
25 them. Participants also appeared to be affected by societal norms of weight with regards to age,  
26 gender and the perceived impact of genetics, and negative experiences of healthcare often resulted in  
27 complete disengagement.  
28  
29  
30  
31  
32  
33  
34  
35  
36  
37  
38  
39  
40

41 We were surprised that clear recommendations for specific changes to internal programme aspects  
42 were not forthcoming from participants across all levels of attendance, as this was a specific intent of  
43 the project. Although factors such as the difficulty of attending programme sessions with shift work  
44 and other stressors were identified as a barrier by some participants, there was no clear consensus on  
45 factors such as timing and location. While forces external to the service affected engagement, our  
46 study indicates that there are opportunities at the service level to facilitate initial and continued  
47 engagement in Whānau Pakari, and potentially other services. Despite the negative experiences of  
48 participants in the health system (both weight and non-weight related), the care received in Whānau  
49  
50  
51  
52  
53  
54  
55  
56  
57  
58  
59  
60

1  
2  
3 Pakari by deliverers was generally seen as ‘different’, and a key reason for wanting to continue with  
4  
5 the service.  
6  
7

8 In our study, many participants who declined further engagement after their referral were reluctant to  
9  
10 identify their young children as having weight issues and requiring assistance. Past research has  
11  
12 identified multiple reasons for parental reluctance to identify overweight in their children,<sup>24</sup> including  
13  
14 not recognising obesity as a ‘disease’ and therefore not warranting the same attention as other health  
15  
16 concerns, and wanting to avoid further stigmatising their child. Our data suggests that families are  
17  
18 especially concerned with the mental health of their children, which was often perceived to be more  
19  
20 important than identifying and addressing overweight and was a key reason for declining referrals.  
21

22 There appears to be a disconnect between the focus on early life intervention due to the growth  
23  
24 trajectories of young children with overweight or obesity into adolescence and adulthood,<sup>25,26</sup> and the  
25  
26 concerns and priorities of parents with young children.  
27

28  
29 Research indicates that parents of girls with overweight or obesity are more likely to enrol them in  
30  
31 healthy lifestyles programmes than families with boys with overweight or obesity.<sup>10</sup> The contrasting  
32  
33 findings of our study, which also included participants who declined their referral, show clear parental  
34  
35 concern for the mental health and self-esteem of their daughters, which may reflect a desire to focus  
36  
37 on positive body image, self-esteem and mental health and avoid increasing body dissatisfaction.<sup>27</sup>  
38

39 The findings of this study would suggest that the differences in how males and females experience  
40  
41 weight in society contributes towards the differing retention rates between male and female  
42  
43 participants at the service level. It is concerning that two important health issues – overweight and  
44  
45 mental health – are pitted against each other as perceived incongruent concerns, given that both are  
46  
47 significant causes of ill-health among children and adolescents, and suboptimal health-related quality  
48  
49 of life was identified in a previous cohort with weight issues.<sup>2</sup>  
50  
51

52 Puhl and colleagues argue that message framing with regards to terminology is vital in childhood  
53  
54 obesity programmes, in order to prevent further stigmatisation of families seeking help for weight.<sup>28</sup>  
55

56 While the Whānau Pakari *programme* aims to be non-judgemental and non-stigmatising, it is equally  
57  
58 important that the *referral* to the service is perceived to be non-stigmatising by families in order to  
59  
60

1  
2  
3 encourage engagement. Given the impact of the referral experience to Whānau Pakari on initial and  
4 continued engagement with the service, the referral process must be respectful and compassionate,  
5 with an acknowledgement of past instances of stigma and discrimination. The sensitivity of weight as  
6 a discussion topic requires non-judgemental language, compassion, and an acknowledgement of the  
7 wider context and potential pressures on the family.<sup>28</sup>  
8  
9  
10  
11  
12

13  
14 As in previous studies,<sup>29</sup> many participants in this study had experienced weight stigma, blame and  
15 judgement from health professionals as well as a societal culture of weight bias. Indigenous  
16 participants often experienced this in addition to varying forms of racism. The impact of racial  
17 discrimination on health care use in NZ is well-documented,<sup>30, 31</sup> and the compounding impact of  
18 multiple stigmas is likely to contribute towards differential attendance rates between Māori and NZ  
19 Europeans. Previous weight bias and racism which occurs outside the service may play a role in  
20 participant reluctance to engage with Whānau Pakari. Further research should investigate the role of  
21 racism and weight stigma in engagement with healthcare for weight issues among ethnic minorities.<sup>32</sup>  
22  
23  
24  
25  
26  
27  
28  
29  
30  
31

### 32 **Strengths and Limitations**

33  
34 The strengths of this study include the large sample size across participants with varying levels of  
35 engagement which allowed for in-depth and broad analysis. In addition, this study included data from  
36 a targeted group of participants (those who declined further contact after referral) whose lack of  
37 contact with the service limits the power of quantitative methods in drawing conclusions, and who are  
38 typically difficult to recruit, as recognised in previous studies.<sup>10</sup> Finally, there was good representation  
39 from families with Māori children who comprised approximately half of the interviews, allowing us to  
40 draw conclusions for a group whose voice is historically absent from obesity research.  
41  
42  
43  
44  
45  
46  
47  
48  
49

50 The main limitation of this study was the lack of child and adolescent voice with regards to their  
51 experiences with Whānau Pakari. While it was intended to conduct interviews with families, many  
52 parents at recruitment were reluctant to involve their children due to the sensitivity of material  
53 discussed or were unable to involve them due to timing issues. This meant that children's experiences  
54 have only been explored through their parents' accounts, rather than through their own voice. It is  
55  
56  
57  
58  
59  
60

1  
2  
3 possible that participants were discretionary in what they chose to share; however, the disclosure of  
4 extremely personal and sensitive experiences suggests that any researcher-participant power dynamics  
5 were overcome by steps the interviewers took to mitigate this difference (Appendix One).  
6  
7  
8  
9

## 10 **Conclusions**

11  
12  
13 In conclusion, this study found that much of the difference between Whānau Pakari participants who  
14 engaged highly and those who did not engage appeared to be due to the degree to which participants  
15 were affected by the impact of factors at the system and societal levels. Focusing purely on weight in  
16 multicomponent interventions does not acknowledge the complexity of contemporary family life.  
17 However, family-based multidisciplinary intervention programmes such as Whānau Pakari are an  
18 opportunity to acknowledge the wider societal challenges affecting achievement of healthy lifestyle  
19 change. Health professionals and providers can engage in respectful and compassionate care to help  
20 counteract past negative experiences of healthcare. Referral pathways for healthy lifestyle change  
21 programmes need to be as flexible as possible to remove any barriers to engagement, and referrers  
22 need to develop a deeper understanding of the importance of the referral conversation in relation to  
23 weight. Respectful, compassionate care is critical to enhanced retention in programmes, and ongoing  
24 engagement in healthcare services overall.  
25  
26  
27  
28  
29  
30  
31  
32  
33  
34  
35  
36  
37  
38

## 39 *Acknowledgements*

40  
41 The authors acknowledge Dr Donna Cormack (Te Kupenga Hauora Māori) for her contribution to the  
42 research and critical appraisal of the manuscript.  
43  
44  
45

46 Numerous authors within our research group are increasingly aware that the use of terms such as  
47 obesity are contested and increasingly problematic, partly due to the experiences of participants in  
48 terms of weight stigma. We have therefore used this term where it relates to referenced works,  
49 prevalence, and to communicate to the biomedical community, but have used alternate terms  
50 wherever possible to ensure a person-centred approach, prioritising the experience and voice of those  
51 working towards achieving healthy lifestyle change  
52  
53  
54  
55  
56  
57  
58  
59  
60

### *Declarations of interests*

We have read and understood BMJ policy on declaration of interests and declare that we have no competing interests. All authors have completed the Unified Competing Interest form (available on request from the corresponding author) and declare: no support from any organisation for the submitted work; no financial relationships with any organisations that might have an interest in the submitted work in the previous three years, no other relationships or activities that could appear to have influenced the submitted work.

### *Ethics committee approval*

Ethical approval for the Whānau Pakari Barriers and Facilitators study was granted by Central Health and Disability Ethics Committee (NZ) (17/CEN/158/AM01). Written informed consent was obtained from all study participants.

### *Transparency statement*

The lead author affirms that the manuscript is an honest, accurate, and transparent account of the study being reported; that no important aspects of the study have been omitted; and that any discrepancies from the study as originally planned have been explained.

### *Contributorship statement*

CEKW was involved in study design, data collection, analysis, interpretation, and writing of the manuscript. NR contributed towards study design, data collection and manuscript appraisal. EW contributed towards study design, oversaw analysis and interpretation, and was involved in writing of the manuscript. PH was involved in study design and critical appraisal of the manuscript. YA was involved in study design, analysis, interpretation, and writing of the manuscript.

### *Role of the funding source*

This research was funded by A Better Start National Science Challenge and Cure Kids. The funders had no role in the conduct of the research, study design, collection, analysis and interpretation of data, in the writing of the manuscript and in the decision to submit the article for publication. The researchers are independent from the funders and all had full access to all of the data in the study and can take responsibility for the integrity of the data and the accuracy of the data analysis.



### *Data sharing statement*

No additional data available.

### *References*

1. Lakshman R, Elks CE, Ong KK. Childhood obesity. *Circulation*. 2012;126(14):1770-9.
2. Anderson YC, Wynter LE, Treves KF, et al. Assessment of health-related quality of life and psychological well-being of children and adolescents with obesity enrolled in a New Zealand community-based intervention programme: an observational study. *BMJ Open*. 2017;7(8).
3. Anderson YC, Wynter LE, Butler MS, et al. Dietary Intake and Eating Behaviours of Obese New Zealand Children and Adolescents Enrolled in a Community-Based Intervention Programme. *PLoS ONE*. 2016;11(11):e0166996.
4. Anderson YC, Wynter LE, Grant CC, et al. Physical activity is low in obese New Zealand children and adolescents. *Sci Rep*. 2017;7:41822.
5. Anderson YC, Wynter LE, Treves KF, et al. Prevalence of comorbidities in obese New Zealand children and adolescents at enrolment in a community-based obesity programme. *J Paediatr Child Health*. 2016;52(12):1099-105.
6. World Health Organization. Report of the Commission on Ending Childhood Obesity. Geneva, Switzerland: World Health Organization; 2016. Contract No.: Report.
7. O'Connor EA, Evans CV, Burda BU, et al. Screening for Obesity and Intervention for Weight Management in Children and Adolescents: Evidence Report and Systematic Review for the US Preventive Services Task Force. *Jama*. 2017;317(23):2427-44.
8. Skelton JA, Beech BM. Attrition in paediatric weight management: a review of the literature and new directions. *Obesity reviews : an official journal of the International Association for the Study of Obesity*. 2011;12(5):e273-81.
9. Swinburn BA, Sacks G, Hall KD, et al. The global obesity pandemic: shaped by global drivers and local environments. *The Lancet*. 2011;378(9793):804-14.
10. Kelleher E, Davoren MP, Harrington JM, et al. Barriers and facilitators to initial and continued attendance at community-based lifestyle programmes among families of overweight and obese children: a systematic review. *Obesity reviews : an official journal of the International Association for the Study of Obesity*. 2017;18(2):183-94.
11. Perry RA, Daniels LA, Bell L, Magarey AM. Facilitators and Barriers to the Achievement of Healthy Lifestyle Goals: Qualitative Findings From Australian Parents Enrolled in the PEACH Child Weight Management Program. *J Nutr Educ Behav*. 2017;49(1):43-52.e1.
12. Anderson YC, Wynter LE, Moller KR, et al. The effect of a multi-disciplinary obesity intervention compared to usual practice in those ready to make lifestyle changes: design and rationale of Whanau Pakari. *BMC obesity*. 2015;2:41.

13. Anderson Y, Wynter L, Grant C, et al. A novel home-based intervention for child and adolescent obesity: the results of the Whānau Pakari randomized controlled trial. *Obesity*. 2017;25(11):1965-73.
14. Anderson Y, Wild C, Hofman P, et al. Participant and caregivers' experiences of a multi-disciplinary programme for healthy lifestyle change in Aotearoa/New Zealand. *Health Promotion International*. 2019;In Review.
15. Wild CEK, O'Sullivan NA, Lee AC, et al. Survey of Barriers and Facilitators to Engagement in a Multidisciplinary Healthy Lifestyles Program for Children. *Journal of Nutrition Education and Behavior*. 2019.
16. Reid P, Paine SJ, Curtis E, et al. Achieving health equity in Aotearoa: strengthening responsiveness to Maori in health research. *The New Zealand medical journal*. 2017;130(1465):96-103.
17. Valencia RR. *The evolution of deficit thinking: Educational thought and practice*: Routledge; 2012.
18. Curtis E. Indigenous Positioning in Health Research: The importance of Kaupapa Māori theory-informed practice. *AlterNative*. 2016;12(4):396-410.
19. Cole TJ. A chart to link child centiles of body mass index, weight and height. *Eur J Clin Nutr*. 2002;56(12):1194-9.
20. Ministry of Health NZ. *HISO 10001:2017 Ethnicity Data Protocols*. 2017.
21. MAXQDA 2018. Berlin, Germany: VERBI Software; 2018.
22. Airini DBC, Elana; Johnson, Odie; Luatua, Fred, O'Shea, Mona; Rakena, Te Oti; Reynolds, Gillian; Sauni, Pale; Smith, Angie; Huirua, To'aiga Su'a; Tarawa, Matt; Ulugia-Pua, Meryl;. *Success for all: Improving Māori and Pasifika student success in degree-level studies*. Auckland; 2009.
23. Curtis ET, Wikaire E, Lualua-Aati T, et al. *Tātou tātou/success for all: Improving Māori student success*. Wellington: Ako Aotearoa National Centre for Tertiary Teaching Excellence; 2012.
24. Towns N, D'Auria J. Parental Perceptions of Their Child's Overweight: An Integrative Review of the Literature. *Journal of Pediatric Nursing*. 2009;24(2):115-30.
25. Geserick M, Vogel M, Gausche R, et al. Acceleration of BMI in Early Childhood and Risk of Sustained Obesity. *New England Journal of Medicine*. 2018;379(14):1303-12.
26. *Childhood Obesity Plan* Wellington: Ministry of Health, New Zealand; [updated 24 April 2019; cited 2019 12 November 2019]. Available from: <https://www.health.govt.nz/our-work/diseases-and-conditions/obesity/childhood-obesity-plan>.
27. Puhl R, Brownell KD. Bias, Discrimination, and Obesity. *Obesity Research*. 2001;9(12):788-805.
28. Puhl RM, Latner JD. Stigma, obesity, and the health of the nation's children. *Psychological bulletin*. 2007;133(4):557-80.

- 1  
2  
3 29. Smith KL, Straker LM, McManus A, Fenner AA. Barriers and enablers for participation in  
4 healthy lifestyle programs by adolescents who are overweight: a qualitative study of the opinions of  
5 adolescents, their parents and community stakeholders. *BMC Pediatrics*. 2014;14(1):53.  
6  
7  
8 30. Harris RB, Cormack DM, Stanley J. Experience of racism and associations with unmet need  
9 and healthcare satisfaction: the 2011/12 adult New Zealand Health Survey. *Aust N Z J Public Health*.  
10 2019;43(1):75-80.  
11  
12 31. Harris R, Cormack D, Tobias M, et al. The pervasive effects of racism: experiences of racial  
13 discrimination in New Zealand over time and associations with multiple health domains. *Social*  
14 *science & medicine (1982)*. 2012;74(3):408-15.  
15  
16 32. Wild CE, Rawiri N, Willing EJ, et al. What affects programme engagement for Māori  
17 families? A qualitative study of a family-based, multi-component healthy lifestyle programme for  
18 children and adolescents. Submitted paper. 2019.  
19  
20  
21  
22  
23  
24  
25  
26  
27  
28  
29  
30  
31  
32  
33  
34  
35  
36  
37  
38  
39  
40  
41  
42  
43  
44  
45  
46  
47  
48  
49  
50  
51  
52  
53  
54  
55  
56  
57  
58  
59  
60

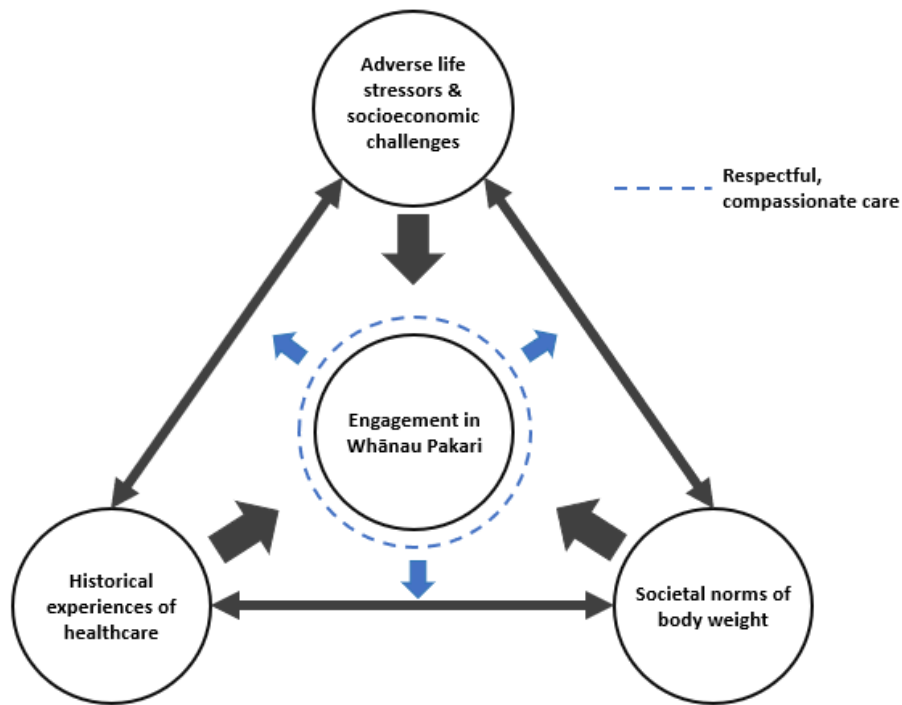

review only

1  
2  
3  
4  
5  
6  
7  
8  
9  
10  
11  
12  
13  
14  
15  
16  
17  
18  
19  
20  
21  
22  
23  
24  
25  
26  
27  
28  
29  
30  
31  
32  
33  
34  
35  
36  
37  
38  
39  
40  
41  
42  
43  
44  
45  
46  
47  
48  
49  
50  
51  
52  
53  
54  
55  
56  
57  
58  
59  
60

## COREQ (Consolidated criteria for reporting qualitative research)

### Domain 1: Research team and reflexivity

#### *Personal characteristics*

#### 1. Interviewer

Cervantée Wild & Ngauru Rawriri conducted the interviews.

#### 2. Credentials and 3. Occupation

Cervantée Wild (BHSc(Hons), BA) – PhD candidate, Liggins Institute, University of Auckland

Ngauru Rawiri – BHSc student, Te Reo Māori teacher (tertiary level) and interview facilitator, Liggins Institute, University of Auckland

Paul Hofman (MbChB, Dip Obs, FRACP) – Professor and paediatric endocrinologist

Esther Willing (PhD) – Lecturer in Hauora Māori, Kōhatu – Centre for Hauora Māori, University of Otago

Yvonne Anderson (PhD, Dip Paeds, MBChB, FRACP, BSc (Psych)) – Senior research fellow and paediatrician

#### 4. Gender & ethnicity

CW – female, New Zealand European

NR – female, Māori (Ngāti Mutunga, Ngāti Tama, Ngāti Rāhiri o Te Ati Awa me Ngai Tūhoe)

PH – male, New Zealand European

EW – female, Māori (Ngāti Toarangatira, Ngāti Koata me Ngā Ruahine)

YA – female, New Zealand European

#### 5. Experience and training

CW had qualitative research training through the PhD (supervised by PH, EW, and YA). NR had interview experience through her career. PH is an experienced researcher in child health and endocrinology. EW is an experienced qualitative researcher and has extensive experience in Māori health research. YA is an experienced researcher in child health, especially childhood obesity.

#### *Relationship with participants*

#### 6. Relationship established

All participants were recruited as described below, and some were already known to NR through relationship networks.

#### 7. Participant knowledge of the interviewer

1  
2  
3 The participants knew the reasons for conducting the research (detailed in the patient information  
4 and consent form), and participants were aware that the study would specifically ask about the  
5 factors that contributed to their decisions to engage or not engage, in order to improve the service.  
6 Participants were also aware that the interviewers were separate and distinct from the clinical  
7 service team.  
8

## 9 10 8. Interviewer characteristics

11 NR is a Māori researcher (of Ngāti Mutunga, Ngāti Tama, Ngāti Rāhiri o Te Ati Awa and Ngai Tūhoe  
12 descent) and CW is New Zealand European. This mixed Indigenous – non-Indigenous partnership  
13 allowed us to connect and establish rapport with participants, depending on the interview  
14 participant and context. NR's role as a parent had the advantage that familiarity with this stage of  
15 life helped her understand participants' stories and ask exploratory questions.  
16  
17

## 18 **Domain 2: Study design**

### 19 *Theoretical framework*

## 20 9. Methodological orientation and Theory

21  
22 The research approach was informed by Kaupapa Māori theory. The approach was developed to  
23 minimise any perceived power imbalances between the interview team and the participants and  
24 make the interview experience as comfortable as possible. We used thematic analysis to analyse the  
25 interviews.  
26  
27

### 28 *Participant selection*

## 29 10. Sampling and 11. Method of approach

30  
31 We used purposive sampling to identify potential participants who fit the criteria, and then  
32 randomised the list of potential participants in each group. We then contacted each participant one  
33 by one. Participants were recruited by telephone and interviewed in person over a six-month period  
34 from June to December 2018.  
35  
36  
37

## 38 12. Sample size

39 For funding and resource reasons, we had a maximum total of 74 potential interviews with families.  
40 We conducted 64 interviews in total.  
41  
42

## 43 13. Non-participation

44 We approached 150 families, of which 40 were uncontactable and 46 declined because they had  
45 moved out of the region, were too busy with work, or didn't remember the referral.  
46  
47

### 48 *Setting*

## 49 14. Setting of data collection

50 Participants were interviewed in person at their home, workplace, or at a local community child  
51 health centre. All participants chose where they would prefer to be interviewed.  
52  
53

## 54 15. Presence of non-participants

55 For most interviews, only the participant and interviewers were present, but there were occasionally  
56 other family members present, such as young children (<5 years).  
57  
58  
59  
60

1  
2  
3 16. Description of sample  
4

5 Half the interviews were with families with Māori children. Most (80%) were solely with a female  
6 parent/caregiver (13 interviews included male parents and/or caregivers). Eleven interviews  
7 involved two or more family members. Five interviews included a child participant.  
8

9 *Data collection*  
10

11 17. Interview guide  
12

13 A semi-structured interview framework was used and adjusted for relevance as each interview  
14 progressed. It was not pilot tested.  
15

16 18. Repeat interviews  
17

18 Repeat interviews were not conducted, but participants were offered their transcripts for review  
19 after the interview.  
20

21 19. Audio recording  
22

23 Interviews were audiotaped digitally and transcribed by a medical typist.  
24

25 20. Field notes  
26

27 Field notes were made after each interview and kept as part of a reflexive notes.  
28

29 21. Duration  
30

31 Interview audio recordings ranged from nine minutes to 107 minutes (mean 31 minutes).  
32

33 22. Data saturation  
34

35 Data saturation was reached in each group of participants in each level of engagement.  
36

37 23. Transcripts returned  
38

39 Transcripts were anonymised and returned to the participant for checking, including deletions of  
40 portions if desired.  
41  
42

43 **Domain 3: analysis and findings**  
44

45 *Data analysis*  
46

47 24. Number of data coders  
48

49 Eight transcripts were independently coded by CW and EW and discussed for consistency. After the  
50 coding matrix was constructed and consensus on codes reached, all transcripts were coded again by  
51 CW.  
52

53 25. Description of the coding tree  
54

55 A 'mind map' was used instead of a coding tree in order to better capture complexity and avoid an  
56 artificial hierarchy that did not adequately represent the inter-relationships between the themes,  
57 since themes could become more major or minor depending on the context.  
58

59 26. Derivation of themes  
60

1  
2  
3 Themes were derived from the data.  
4

5 27. Software

6  
7 MAXQDA software was used to manage the data.  
8

9 28. Participant checking

10 Participants did not provide feedback on the findings.  
11  
12  
13

14 *Reporting*

15  
16 29. Quotations presented

17  
18 Participant quotations are presented in Panel 1 and throughout the manuscript. They are not  
19 identified by participant number.  
20

21 30. Data and findings consistent

22  
23 There was good consistency between data and findings, with the two interviewers working to  
24 discuss findings and the wider research team providing critique and challenging interpretations of  
25 data.  
26

27 31. and 32. Clarity of major and minor themes

28  
29 A distinction was made between 'major' and 'minor' themes with sub-themes capturing the range of  
30 participant experiences under each major theme. However, even major themes could not be cleanly  
31 separated, reflecting real-world complexity.  
32  
33

34  
35 Reference: Tong A, Sainsbury P, Craig J. Consolidated criteria for reporting qualitative research  
36 (COREQ): a 32-item checklist for interviews and focus groups. *Int J Qual Health Care* 2007; 19, 349–  
37 357. doi: 10.1093/intqhc/mzm042  
38

39  
40 NB. This checklist has been amended to capture ethnicity and gender breakdown, to reflect the  
41 composition of the research team.  
42  
43  
44  
45  
46  
47  
48  
49  
50  
51  
52  
53  
54  
55  
56  
57  
58  
59  
60



# BMJ Open

## Determining barriers and facilitators to engagement for families in a family-based multicomponent healthy lifestyles intervention for children and adolescents: a qualitative study

|                                 |                                                                                                                                                                                                                                                                                                                                                                                                                              |
|---------------------------------|------------------------------------------------------------------------------------------------------------------------------------------------------------------------------------------------------------------------------------------------------------------------------------------------------------------------------------------------------------------------------------------------------------------------------|
| Journal:                        | <i>BMJ Open</i>                                                                                                                                                                                                                                                                                                                                                                                                              |
| Manuscript ID                   | bmjopen-2020-037152.R1                                                                                                                                                                                                                                                                                                                                                                                                       |
| Article Type:                   | Original research                                                                                                                                                                                                                                                                                                                                                                                                            |
| Date Submitted by the Author:   | 09-Jun-2020                                                                                                                                                                                                                                                                                                                                                                                                                  |
| Complete List of Authors:       | Wild, Cervantée; The University of Auckland Liggins Institute, Rawiri, Ngauru; The University of Auckland Liggins Institute<br>Willing, Esther; University of Otago, Kōhatu – Centre for Hauora Māori<br>Hofman, Paul; The University of Auckland Liggins Institute; Starship Children's Health<br>Anderson, Yvonne; The University of Auckland Liggins Institute; Taranaki District Health Board, Department of Paediatrics |
| <b>Primary Subject Heading</b>: | Health services research                                                                                                                                                                                                                                                                                                                                                                                                     |
| Secondary Subject Heading:      | Paediatrics, Qualitative research                                                                                                                                                                                                                                                                                                                                                                                            |
| Keywords:                       | PAEDIATRICS, Community child health < PAEDIATRICS, QUALITATIVE RESEARCH                                                                                                                                                                                                                                                                                                                                                      |
|                                 |                                                                                                                                                                                                                                                                                                                                                                                                                              |

SCHOLARONE™  
Manuscripts



I, the Submitting Author has the right to grant and does grant on behalf of all authors of the Work (as defined in the below author licence), an exclusive licence and/or a non-exclusive licence for contributions from authors who are: i) UK Crown employees; ii) where BMJ has agreed a CC-BY licence shall apply, and/or iii) in accordance with the terms applicable for US Federal Government officers or employees acting as part of their official duties; on a worldwide, perpetual, irrevocable, royalty-free basis to BMJ Publishing Group Ltd ("BMJ") its licensees and where the relevant Journal is co-owned by BMJ to the co-owners of the Journal, to publish the Work in this journal and any other BMJ products and to exploit all rights, as set out in our [licence](#).

The Submitting Author accepts and understands that any supply made under these terms is made by BMJ to the Submitting Author unless you are acting as an employee on behalf of your employer or a postgraduate student of an affiliated institution which is paying any applicable article publishing charge ("APC") for Open Access articles. Where the Submitting Author wishes to make the Work available on an Open Access basis (and intends to pay the relevant APC), the terms of reuse of such Open Access shall be governed by a Creative Commons licence – details of these licences and which [Creative Commons](#) licence will apply to this Work are set out in our licence referred to above.

Other than as permitted in any relevant BMJ Author's Self Archiving Policies, I confirm this Work has not been accepted for publication elsewhere, is not being considered for publication elsewhere and does not duplicate material already published. I confirm all authors consent to publication of this Work and authorise the granting of this licence.

1  
2  
3 **Determining barriers and facilitators to engagement for families in a family-based**  
4 **multicomponent healthy lifestyles intervention for children and adolescents: a qualitative study**  
5  
6

7 Cervantée EK Wild, Ngauru Rawiri, Esther J Willing, Paul L Hofman, Yvonne C Anderson  
8  
9

10  
11  
12  
13 **Author addresses and positions**  
14

15  
16 Cervantée Wild  
17

18  
19 Liggins Institute, University of Auckland, 85 Park Road, Grafton, Auckland 1023, New Zealand.  
20

21  
22 [cervantee.wild@auckland.ac.nz](mailto:cervantee.wild@auckland.ac.nz)  
23

24  
25 [cervantee.wild@tdhb.org.nz](mailto:cervantee.wild@tdhb.org.nz)  
26

27  
28 PhD candidate  
29

30  
31  
32  
33 Ngauru Rawiri  
34

35  
36 Liggins Institute, University of Auckland, 85 Park Road, Grafton, Auckland 1023, New Zealand.  
37

38  
39 [nanurawiri@gmail.com](mailto:nanurawiri@gmail.com)  
40

41  
42 Interview facilitator  
43

44  
45  
46  
47 Esther J Willing  
48

49  
50 Kōhatu – Centre for Hauora Māori, University of Otago, 362 Leith Street, North Dunedin, Dunedin  
51

52  
53 9016, New Zealand.  
54

55  
56 [esther.willing@otago.ac.nz](mailto:esther.willing@otago.ac.nz)  
57

58  
59 Lecturer  
60

1  
2  
3 Paul L Hofman  
4

5  
6 Liggins Institute, University of Auckland, 85 Park Road, Grafton, Auckland 1023, New Zealand.  
7

8  
9 Professor

10  
11 Starship Children's Hospital, Auckland District Health Board, 2 Park Road, Grafton, Auckland 1023,  
12  
13 New Zealand.  
14

15  
16 [p.hofman@auckland.ac.nz](mailto:p.hofman@auckland.ac.nz)  
17

18  
19 Paediatric endocrinologist  
20  
21

22  
23  
24  
25 Yvonne C Anderson

26  
27 Department of Paediatrics: Child and Youth Health, Faculty of Medical and Health Sciences and  
28  
29 Liggins Institute, University of Auckland, 85 Park Road, Grafton, Auckland 1023, New Zealand.  
30

31  
32 Senior Lecturer and Research Fellow  
33

34  
35 Department of Paediatrics, Taranaki District Health Board, David Street, Westown, New Plymouth  
36  
37 4310, New Zealand.  
38

39  
40 [y.anderson@auckland.ac.nz](mailto:y.anderson@auckland.ac.nz)  
41

42  
43 Paediatrician  
44  
45  
46  
47

48 **Correspondence to:**  
49

50  
51 Cervantée Wild  
52

53  
54 Liggins Institute, University of Auckland  
55

56  
57 85 Park Road, Grafton  
58

59  
60 Auckland, New Zealand

1  
2  
3 cervantee.wild@auckland.ac.nz  
4  
5

6 *The Corresponding Author has the right to grant on behalf of all authors and does grant on behalf of*  
7 *all authors, an exclusive licence (or non exclusive for government employees) on a worldwide basis to*  
8 *the BMJ Publishing Group Ltd to permit this article (if accepted) to be published in BMJ editions and*  
9 *any other BMJ PGL products and sublicences such use and exploit all subsidiary rights, as set out in*  
10 *our licence.*  
11  
12  
13  
14  
15  
16  
17  
18  
19  
20  
21  
22  
23  
24  
25  
26  
27  
28  
29  
30  
31  
32  
33  
34  
35  
36  
37  
38  
39  
40  
41  
42  
43  
44  
45  
46  
47  
48  
49  
50  
51  
52  
53  
54  
55  
56  
57  
58  
59  
60

For peer review only

## ABSTRACT

**Objectives:** Recruitment and retention in child and adolescent healthy lifestyle intervention services for childhood obesity is challenging, and inequalities across social groups are persistent. This study aimed to understand the barriers and facilitators to engagement in a multicomponent assessment-and-intervention healthy lifestyle programme for children and their families, based in the home and community.

**Design:** Qualitative interview-based study of past users (n=76) of a family-based multicomponent healthy lifestyle programme in a mixed urban-rural region of New Zealand. Semi-structured, home-based interviews were conducted and thematically analysed with peer debriefing for validity.

**Participants:** Families were selected through stratified random sampling to include a range of levels of engagement, including those who declined their referral, with equal numbers of interviews with Indigenous and non-Indigenous families.

**Results:** Three interactive and compounding determinants were identified as influencing engagement in Whānau Pakari: acute and chronic life stressors, societal norms of weight and body size, and historical experiences of healthcare. These determinants were present across societal, system and healthcare service levels. A negative referral experience to Whānau Pakari often resulted in participants declining further input or disengaging from the programme. A fourth domain, respectful and compassionate healthcare, was identified as a mitigator of these three themes, facilitating participant engagement despite previous negative experiences.

**Conclusions:** While participant engagement in healthy lifestyle programmes is affected by determinants which appear to operate outside immediate service provision, the programme is an opportunity to acknowledge past instances of stigma and the wider challenges of healthy lifestyle change. The experience of the referral to Whānau Pakari is important for setting the scene for future engagement in the programme. Respectful, compassionate care is critical to enhanced retention in multidisciplinary healthy lifestyle programmes and ongoing engagement in healthcare services overall.

### Strengths and limitations of this study

- Large sample size (64 interviews with 76 total participants)
- Sample included wide range of participants with varying levels of engagement, including non-service users
- Equal representation from families with Māori and non-Māori children
- Lack of child and adolescent voice
- Participants may not have fully disclosed their experiences to interviewers

### Introduction

Excess weight in childhood and adolescence affects physical, psychological and social health and well-being, and is a known risk factor for comorbidities both in childhood and adulthood.<sup>1</sup> Children with weight issues in Aotearoa/New Zealand (henceforth referred to as New Zealand) demonstrate a high prevalence of weight-related comorbidities, as well as low physical activity, suboptimal eating behaviours, and low health-related quality of life.<sup>2-5</sup> One of the key recommendations of the World Health Organization's Report of the Commission on Ending Childhood Obesity is to "provide family-based, multicomponent lifestyle weight management services for children and young people who are obese".<sup>6</sup> A systematic review and meta-analysis found that a minimum of 26 hours of contact time in lifestyle interventions is associated with improvements in weight status in children and adolescents.<sup>7</sup> However, as with any service attempting to facilitate lifestyle change, success relies on continued family engagement.<sup>8</sup> It is also important that such multidisciplinary services – and other health professionals addressing childhood obesity in a primary care setting – are able to engage with groups most affected by obesity, namely those living in the most deprived areas and ethnic minorities.<sup>9</sup>

Improving *engagement* with childhood obesity services requires addressing both initial recruitment and ongoing retention.<sup>8</sup> Service, system and society-related factors may *enable* or *inhibit* initial and ongoing engagement; factors which are also referred to as facilitators and barriers.<sup>10 11</sup> Kelleher and colleagues' review of the factors affecting attendance at community-based lifestyle programmes

1  
2  
3 found that weight stigma, parental reluctance to identify overweight and logistical challenges were  
4 key barriers to initial and ongoing attendance.<sup>10</sup> Under-represented in the literature are those who  
5 declined treatment altogether, as many past studies had low recruitment from these families. It is  
6 therefore important to understand the experiences of families experiencing childhood obesity in order  
7 to improve initial recruitment and ongoing retention in healthy lifestyle services, particularly for  
8 groups most affected.<sup>10</sup>  
9  
10  
11  
12  
13  
14

15  
16 Whānau Pakari is a family-centred, community-based assessment and intervention programme for  
17 children and their families, based in Taranaki, a mixed urban-rural region of New Zealand (NZ). The  
18 name means 'healthy, self-assured families that are fully active'. The focus of the programme is on  
19 healthy lifestyle change rather than weight loss or obesity, in order to minimise judgement and  
20 weight-related stigma. The multidisciplinary service involves a home-based medical assessment with  
21 advice, removing the hospital appointment in order to *demedicalise* care, and includes weekly  
22 nutrition, physical activity and psychology sessions. This approach takes healthcare outside hospital  
23 walls and into the community, without compromising quality of care. A randomised clinical trial of  
24 the Whānau Pakari model of care demonstrated modest reductions in body mass index (BMI) standard  
25 deviation score (SDS) and improvements in cardiovascular fitness and health-related quality of life.<sup>12</sup>  
26  
27  
28  
29  
30  
31  
32  
33  
34  
35  
36  
37  
38  
39  
40  
41  
42  
43  
44  
45  
46  
47  
48  
49  
50  
51  
52  
53  
54  
55  
56  
57  
58  
59  
60

<sup>13</sup> Greatest improvements in BMI SDS were found in those who attended the recommended  $\geq 70\%$  of  
intense intervention sessions.<sup>13 14</sup> However, Māori (NZ's Indigenous population) and females were  
less likely to attend  $\geq 70\%$  of sessions, with sustained retention in the programme favouring males and  
NZ Europeans.<sup>13</sup>

Previous evaluation of the experiences of Whānau Pakari participants and their caregivers has shown  
the programme to be a positive and beneficial experience for those involved, emphasising the  
importance of connectedness, knowledge-sharing and self-determination, the collective journey  
alongside other families and programme deliverers, and the importance of a non-judgemental,  
respectful environment.<sup>15</sup> A survey of past participants of Whānau Pakari indicated that previous  
experiences of healthcare may influence subsequent engagement with health services, particularly for  
Māori,<sup>16</sup> although this was not elaborated on further by participants. These findings were limited by



1  
2  
3 the survey's relatively small sample size and the lack of representation from participants who declined  
4  
5 intervention. Therefore, the objective of the present study was to understand barriers and facilitators  
6  
7 to initial attendance and ongoing retention in the Whānau Pakari programme.  
8  
9

## 10 *Methods*

### 11 *Design*

12  
13  
14 In NZ, health research is required to be responsive to the needs and diversity of Māori.<sup>17</sup> The study  
15  
16 design and research approach was informed by Kaupapa Māori methodological principles. Kaupapa  
17  
18 Māori theory is a methodology which resists persistent power imbalances and the continued use of  
19  
20 cultural deficit theory (attributing poor health to something inherent to a 'culture') to explain  
21  
22 inequities between Māori and non-Māori,<sup>17 18</sup> and is aligned with a social and structural determinants  
23  
24 of health framework.<sup>19</sup> As a methodological approach, Kaupapa Māori research centres Māori voice  
25  
26 and experience, and prioritises understanding people within their contexts and whānau (families).<sup>19</sup> It  
27  
28 was hoped that this approach would reduce many of the known barriers to research participation for  
29  
30 Indigenous peoples, and enable participants to engage positively in the research process.<sup>20</sup> While  
31  
32 Kaupapa Māori research can use both quantitative and qualitative methods, in this study, a qualitative  
33  
34 research design was chosen in order to ensure that priority was given to ensuring the voices and  
35  
36 experiences of Māori participants were understood in this study.  
37  
38

39  
40 In-depth interviews, centring on participant experience with Whānau Pakari and wider experiences of  
41  
42 the health system, were undertaken. A specific focus was to understand the barriers to attendance and  
43  
44 retention at varying levels of engagement in Whānau Pakari, including those who declined their  
45  
46 referral and had no further contact with the programme. Factors which facilitated both initial and  
47  
48 ongoing engagement were explored.  
49

50  
51 Ethical approval for the Whānau Pakari Barriers and Facilitators study was granted by Central Health  
52  
53 and Disability Ethics Committee (NZ) (17/CEN/158/AM01). Written informed consent was obtained  
54  
55 from all study participants.  
56  
57  
58  
59  
60

### *Patient and Public Involvement statement*

Participants were first involved in the research at the recruitment stage, although some participants had been involved in an earlier related randomised clinical trial.<sup>12</sup> The research questions were informed by the experiences of participants voiced, unsolicited, during clinical assessment during the previous trial and in previous focus group research.<sup>21</sup> The design of the research drew from Kaupapa Māori theory, which informed the research process in order to prioritise the experiences and preferences of participants. The dissemination process to participants was altered as a result of participant preference to receive feedback via a summary video, rather than at a group meeting. Participants were not asked to assess the burden of the time required to participate in the research.

### *Participants*

Eligible participants were parents and/or caregivers of children and adolescents who had been referred to the service from January 2012 to January 2017. Children and adolescents over 11 years of age were also invited to participate. The eligibility criteria for referral to the service are children aged 4 to 16 years, identified as having obesity [body mass index (BMI)  $\geq 98^{\text{th}}$  centile], or overweight (BMI  $> 91^{\text{st}}$  centile) with associated weight-related comorbidities.<sup>12 22</sup>

Participants were recruited from four different groups of Whānau Pakari service users who had varying levels of engagement (Table 1) using stratified random sampling. Recruitment was via telephone call and text message. The sample contained equal numbers of families with Māori and non-Māori children to ensure appropriate representation of Indigenous children's experiences.

### *Data collection*

The semi-structured interviews were approximately 30-60 minutes in duration and conducted by CW and NR together where possible (see supplementary file for interview schedule). NR led the interviews with Māori families when appropriate. Interviews took place in the participant home or alternative locations chosen by the participant (including a hospital, participant workplaces, and a community library) in order to minimise inconvenience and travel barriers. Most interviews were undertaken with one participant (the parent or caregiver) but a portion included two or more family

1  
2  
3 members, including children (Table 1). A *koha* (gift, donation or contribution) was offered to  
4 participants in acknowledgement of their time and as a sign of reciprocity for the information shared.  
5  
6

7  
8 Informed consent was obtained to record, transcribe and analyse participant data. All participant  
9 information was anonymised. Participant ethnicity for both the parent/caregiver and child was  
10 confirmed at the time of the interview by using the NZ Census 2006 ethnicity question.<sup>23</sup> All  
11 interviews were audio-recorded and independently transcribed. Participants were offered their  
12 transcripts to review for accuracy and acceptability.  
13  
14  
15  
16  
17

### 18 *Analysis*

19  
20 Interview transcripts were coded and analysed inductively in MAXQDA (2018),<sup>24</sup> according to Braun  
21 and Clarke's method for reflexive thematic analysis,<sup>25,26</sup> which aligned well with the reflexivity and  
22 awareness of researcher theoretical positioning required of research informed by Kaupapa Maori  
23 Theory. CW developed the coding matrix with peer review from EW, coded the interview data, and  
24 identified the initial themes. The authors collaborated to finalise the themes and develop the  
25 framework. The acknowledgement of different researcher standpoints allowed the authors to debate,  
26 challenge, and refine interpretations of the data, thereby developing a more nuanced interpretation of  
27 the data.<sup>26</sup> Specifically, the researchers agreed to apply the 'Give-Way' rule if there was disagreement  
28 over the interpretation of the data concerning Māori participants, with the final decision involving  
29 cultural interpretation of Māori participants' experiences passing to a Māori researcher.<sup>19,27,28</sup>  
30  
31  
32  
33  
34  
35  
36  
37  
38  
39  
40  
41  
42

43 It became clear from our initial appraisal of the data that the degree to which participants engaged  
44 with the programme was on a continuum rather than fitting neatly into discrete categories. Therefore,  
45 the groups have been analysed together, noting where there may be key differences according to the  
46 degree of engagement.  
47  
48  
49  
50

51  
52 For more detail of this procedure, please refer to the Consolidated Criteria for Reporting Qualitative  
53 Research (COREQ) checklist (Appendix One).  
54  
55  
56  
57  
58  
59  
60

## Results

64 interviews were conducted (out of a potential cohort of 74) with families who had varying levels of engagement, across a six-month period from June to November 2018 (76 participants in total) (Table 1). Half of the interviews were with Māori families (families with a Māori child who had been referred to the service), including interviews with non-Māori parents of a Māori child. Participants included parents, grandparents, other caregivers, and the children/adolescents themselves (n=5) and were from a range of socioeconomic backgrounds (deciles 1-10 of the 2013 NZ Index of Deprivation).<sup>29</sup> Full details of interview recruitment rate and reasons for non-participation are included in the COREQ checklist (Appendix One).

## Demographics

Table 1. Participant demographics

|                              |                                                                       |                 |
|------------------------------|-----------------------------------------------------------------------|-----------------|
| Interview participants N     |                                                                       | 76 <sup>a</sup> |
| Female participant <i>n</i>  |                                                                       | 65              |
| Ethnicity % <sup>b</sup>     | Māori                                                                 | 32              |
|                              | NZ European                                                           | 75              |
|                              | Asian                                                                 | 7               |
|                              | Other European                                                        | 5               |
| Level of engagement <i>n</i> | Attended ≥70% of programme sessions <sup>c</sup>                      | 18              |
|                              | Attended <30% of programme sessions <sup>d</sup>                      | 19              |
|                              | Had one assessment, then discontinued with the programme <sup>e</sup> | 7               |
|                              | Referred, but chose not to engage <sup>f</sup>                        | 20              |

<sup>a</sup>64 interviews total, 11 interviews involved 2+ family members, 5 interviews included a child/adolescent participant in addition to their parent/caregiver Maximum total of 74 potential interviews for funding and

resource reasons. 136 families approached, of which 53 were uncontactable, 7 were living out of the region, and 12 declined (see COREQ checklist for reasons); *b* Total ethnicity output (more than one ethnicity selected); *c* 24 families invited total; *d* 42 families invited total; *e* 15 families invited total; *f* 55 families invited total

### **Box 1: Key determinants of engagement and retention in Whānau Pakari**

#### **Domain 1: Adverse life stressors & socioeconomic deprivation**

‘I wouldn’t say it was, like, you guys as such – it was just the history behind what she had um, but we come from, so um I came from an abusive marriage, which had split up because of abuse... So this was really hard at the time.’

‘Once she lost her father, well that was pretty much the end of it. She just didn’t want to do nothing. As much as I tried to encourage her to, you know, get with the programme, no she just didn’t want to know about it.’

#### ***Competing health priorities***

‘...[DAUGHTER] was under [child and adolescent mental health services] for suicide watch and stuff like that... so for us there was that added stuff as well.’

#### ***Financial insecurity/socioeconomic status***

‘I didn’t have a house and lived in that camper. Yeah, so it just didn’t work out, otherwise she would have gone.’

#### **Domain 2: Societal norms of weight and body size**

##### ***Age***

‘Like, a weight problem, like, at the time he was only 6 years or 7 years.’

‘... we were kind of shocked because they said that [SON] was, like, obese or something ... I don’t think he’s overweight at all... Because he’s really tall... so I don’t understand, like, what sort of weight should he have been because he was, he’s just like a, he was like a normal kid. So I don’t understand what is

1  
2  
3  
4  
5  
6  
7  
8  
9  
10  
11  
12  
13  
14  
15  
16  
17  
18  
19  
20  
21  
22  
23  
24  
25  
26  
27  
28  
29  
30  
31  
32  
33  
34  
35  
36  
37  
38  
39  
40  
41  
42  
43  
44  
45  
46  
47  
48  
49  
50  
51  
52  
53  
54  
55  
56  
57  
58  
59  
60

overweight and underweight. Because I've seen some, not being mean, but overweight kids, and he wasn't overweight.'

### ***Gender***

'She might develop an eating disorder and I don't want that. I'd rather, you know, it's weird, but I'd rather she be overweight than underweight, you know what I mean? I'd hate to deal with an anorexic daughter because that's hard work.'

### ***Perceived genetic disposition***

'You know... it's just the way it is sometimes. Some people get good genes, some people get other genes and it means it doesn't work out.'

## **Domain 3: Historical experiences of healthcare**

### ***Weight stigma and discrimination***

'... having visited for something else entirely different and then being told kind of 'your child's obese and we are going to refer you' and just doing it front of him [...] it was just even in the way that it was delivered and I was kind of not expecting it. I mean, I can see that he's, he's a bit chunky, but I just, I don't know [...] [the referral] was a bit off-putting.'

### ***Racism***

'...people will judge you for what and where, what colour you are or whatever... [it] just made me more determined to get in there and do what I had to do.'

### **Mediator 1: Respectful, compassionate care mitigated past experiences**

'It was not just the families, but also the, what do you call them, the workers... Very supportive, non-judgmental. I think that made a big difference and 'yes we are going to go' because they are not judging you... the staff was very supportive.'

1  
2  
3 Three major interacting domains and subthemes affecting participant engagement are described in box  
4  
5 1 in participants' own words. A fourth domain of respectful, compassionate care was identified as a  
6  
7 mediator, which was able to mitigate the effect of the first three themes. Unique themes according to  
8  
9 level of engagement with the programme were not generated. While each domain was prevalent in  
10  
11 participant accounts across all recruitment categories, the extent to which a domain affected each  
12  
13 group determined engagement.  
14  
15

16 *Domain 1: Obesity sits within the context of multiple other complex stressors for families in NZ*

17  
18 Participation in the Whānau Pakari service was affected by the multiple complex stressors of living in  
19  
20 contemporary NZ. These were acute, one-off adverse events, such as a death in the family, and  
21  
22 chronic, ongoing challenges, such as financial insecurity. Childhood obesity and overweight as a  
23  
24 health concern sat within the context of multiple other important concerns for families. Participants  
25  
26 were often living in 'crisis mode' or dealing with multiple challenges at once, including: financial and  
27  
28 food insecurity, suicide, abusive relationships, deaths in the family, mental health issues, disability,  
29  
30 relocation, marriage & family break-ups, fostering children, children being raised by other caregivers,  
31  
32 drug use and significant other illnesses.  
33  
34

35  
36 For parents of children with multiple health conditions, especially mental health concerns or autism  
37  
38 spectrum disorder, addressing weight was often not perceived to be as important compared with other  
39  
40 competing family health concerns. Parents and caregivers also reported the challenges of balancing  
41  
42 multiple demands such as long work hours, shift work and extracurricular activities alongside  
43  
44 attending Whānau Pakari.  
45  
46

47 'I think he had one of his sporting things on and I was doing 50 hours a week at that time and  
48  
49 I was like 'oh, my God, I can't do it', I couldn't do it. I mean, if he needed, if I felt like he  
50  
51 needed to be there, I would get him there, like, it's, my work's not that important. Weeds and  
52  
53 shit can wait, you know, like, people can wait um if it was a, if I felt like it was serious. I  
54  
55 would have got him there, but I just yeah.'  
56  
57  
58  
59  
60

1  
2  
3 Similarly, socioeconomic deprivation and food insecurity was perceived to be a more immediate and  
4 pressing concern than childhood overweight or obesity. Both initial attendance and ongoing retention  
5 were affected by a lack of participant resources, even if participants expressed a desire to attend.  
6  
7

8  
9 Participants who engaged with Whānau Pakari and other services despite the impact of adverse  
10 stressors appeared to have more resources, and thus were less affected by this domain.  
11  
12

13  
14 *Domain 2: Societal norms of weight and body size affect how people experience seeking care for*  
15 *weight*  
16  
17

18 Societal norms and beliefs around weight and body size led to the minimisation of obesity and the fear  
19 of stigmatisation for participants (see also Domain 3). These manifested differently according to the  
20 age, gender and the perceived role of genetics in obesity, and resulted in lower engagement. An  
21 exception was participant beliefs around perceived genetic propensity towards obesity, which in some  
22 cases led to higher rather than lower participant engagement.  
23  
24  
25  
26  
27  
28

29 The age of the child involved in the service affected the degree to which families chose to engage, due  
30 to a perception that children were too young to have weight problems, which was a key reason for  
31 both dropping out of the service early or declining input altogether. Children who were clinically  
32 overweight or had obesity were perceived to be a normal weight in early childhood and increasingly  
33 beyond. Some participants felt that while their child might not fit into a set of assessment criteria, this  
34 did not necessarily equate to their child being unhealthy.  
35  
36  
37  
38  
39  
40  
41

42  
43 ‘When he got put in the [...] ‘oh, he’s overweight’ box. And when you’re, like, ‘he’s not that  
44 overweight’, because it was just he wasn’t in their little boxes. I think that more annoyed me,  
45 is that they’ve got these sort of, like, ‘this is the normal weight for a 5 year old’. Well, there’s  
46 all sorts of different 5 year olds. He’s now 10 years and he is my height [...] he’s a big guy.’  
47  
48  
49  
50  
51

52 There was a strong belief that if children were ‘big but active’, then their weight was not a concern.  
53  
54

55 ‘...he’s always been big, but he’s really active. Like he wins the triathlons and the cross-  
56 country and he bikes and swims... it’s not like he can’t exercise or is held up, you know what  
57 I mean? And so we just thought well, and it’s not like he wasn’t healthy eating.’  
58  
59  
60



1  
2  
3 Families appeared more reluctant to engage their female children in services that are characterised as  
4 weight-related, both at initial recruitment and throughout the programme, for fear of their child  
5 developing self-esteem issues. Parents also reported their daughters were often reluctant to attend  
6 themselves.  
7  
8  
9  
10

11  
12 ‘To me it’s like you don’t need to involve her because she’s already self-conscious, soft-  
13 hearted, already upset about it sort of thing and, like, to me it was like more of a trigger. So, I  
14 was, like, no. I will do it my way. So I pulled back because it wasn’t worth it for her, you  
15 know what I mean? Like, her self-esteem and stuff is worth more than, you know, going to a  
16 dietitian where at home I can just stop giving her all that stuff to make her healthier. So that’s  
17 where it comes across wrong.’  
18  
19  
20  
21  
22  
23  
24

25  
26 Overweight and obesity was often associated with perceived genetic propensity to obesity by  
27 participants. This was sometimes specifically linked to ethnicity, and specifically that Māori and  
28 Pacific Island peoples are ‘naturally big’. A perceived familial propensity towards overweight resulted  
29 in participants reportedly acting in two ways: either they did not want to engage because they felt that  
30 there was no point, given they perceived their weight to be genetic (panel 1), or they were compelled  
31 to engage more in order to counteract their genetics:  
32  
33  
34  
35  
36  
37  
38

39 ‘My side of the family is really obese so weight has always been an issue, so if you are trying to  
40 diet everyone gets behind you because they know what the challenge and the battle is. No, we  
41 don’t really care what other people say, we just get on with it.’  
42  
43  
44  
45

### 46 *Domain 3: Historical experiences of healthcare affect future perception and engagement with* 47 *services*

48  
49 Past experiences of healthcare influenced participants’ opinions, perceptions and behaviour in relation  
50 to seeking care again. This was a multidimensional phenomenon, acting across both weight and  
51 ethnicity. If participants had had negative experiences in the health system in relation to their weight  
52 or ethnicity, then they were less willing to engage with Whānau Pakari and other health services. This  
53 mostly affected participants who declined further input after their referral or who discontinued after  
54  
55  
56  
57  
58  
59  
60

1  
2  
3 one assessment. This was especially important if the referral experience to Whānau Pakari was  
4 negative, given that this may have been the first instance of being confronted about their child's  
5 weight.  
6  
7  
8  
9

10 'Basically they told her she was obese [at the B4 School Check] ... Yeah, that she was obese  
11 for her age and they said this in front of her, and she was like "what is obese"? And they said,  
12 "you're bigger than any other child your age" but she's not the only one [...] So they say it in  
13 front of a child, it sort of knocks their self-esteem and their confidence right back.'  
14  
15  
16  
17  
18

19 While weight stigma was experienced across all groups of participants, there were few feelings of  
20 stigma about attending Whānau Pakari for those participants who engaged highly ( $\geq 70\%$  of sessions):  
21  
22  
23

24 'There was nothing to be embarrassed about. You know, like secretive about it. It was  
25 something that I was doing for my kid, to help her get better in herself and if someone else  
26 had a problem then that was their problem, not mine. At the end of the day it is about her. Not  
27 about what anyone else thought.'  
28  
29  
30  
31  
32

33 Experiences of racism in the healthcare system and in wider society affected how participants  
34 reengaged with health services. This included a wide range of race-related experiences from  
35 interpersonal to institutionalised racism. Likewise, participants recounted a variety of responses to  
36 these experiences from renewal of engagement and wanting to 'prove them wrong', to disengagement  
37 with outside entities and organisations, to internalised racism.  
38  
39  
40  
41  
42  
43

44 '...we have been through so much stigmatisation that nothing more than one thing matters  
45 [...] because for us it's about the betterment of our children and our whānau [family] as a  
46 unit.'  
47  
48  
49  
50

### 51 *Mediator 1: Respectful, compassionate care mitigated past experiences*

52  
53 Conversely, positive and respectful care received in both the Whānau Pakari programme and in other  
54 areas of the health system mitigated the effect of the first three determinants, particularly against the  
55 impact of past negative experiences of healthcare. A positive referral experience generally set a  
56 positive tone for interacting with the Whānau Pakari service itself.  
57  
58  
59  
60

1  
2  
3 ‘So we decided yes, this would be an awesome programme for our daughter, because we  
4 wanted her to just have some stability at the time because she was just starting High School,  
5 going into a phase where people were judging and things like that, you know, building her  
6 self-esteem [...] It’s helped her with her confidence and just building a life that’s easy for her,  
7 you know. So, yeah, I thank [referrer] for that and for putting us onto that programme too  
8 because it was really awesome. We, as a whānau, we enjoyed it, and just being able to support  
9 her in that programme.’

10  
11  
12  
13  
14  
15  
16  
17  
18  
19 Participants who did engage with Whānau Pakari reported that the care received in the programme  
20 was ‘different’ from previous care received and that the programme deliverers were ‘like a family’.  
21  
22 For these families, the respectful and compassionate care countered some of the negative effects of  
23 past experiences.  
24  
25  
26

27  
28 ‘It was just the people, that’s all it was. It was just the approach of the people to be honest um  
29 and that made us comfortable, and I go by my children a lot because if they’re uncomfortable  
30 well then they’re not the right people to be around for us. And they were comfortable.’  
31  
32  
33

34  
35 The social and team aspects of Whānau Pakari were beneficial for families, as well as the perceived  
36 extra care received  
37  
38

39  
40 ‘I liked it. I didn’t think I was going to. I thought ‘oh, this is going to be stupid’, but no it  
41 wasn’t. It was actually a bit of an eye opener. I actually learnt something. And then we just  
42 recently got her blood tests and all that done again because through the doctors they didn’t do  
43 no diabetic tests or anything like that. Through Whānau [Pakari] they did. They did heaps  
44 more than the doctors did. So I think that’s pretty much why we stayed with them, it was like  
45  
46  
47  
48  
49  
50 ‘aha, we can get some serious help here’.  
51

52  
53 Figure 1 summarises the interacting and mitigating domains affecting participant engagement.  
54  
55  
56  
57  
58  
59  
60

## Discussion

This study found that engagement in Whānau Pakari was determined by the degree to which participants were affected by three interactive domains: complex adverse life stressors, societal norms of weight and body size, and past experiences of healthcare. These complex mechanisms operated at multiple levels including at the service, health system and wider societal levels, so that experiences at the seemingly distal societal level could still have an impact on participant engagement at the service level. While the impact of these factors was evident across all four groups, some participants appeared to be resilient to the impact of these determinants. Additionally, respectful and compassionate care appeared to act as a positive mediator. Conversely, participants who declined further input after their referral were more likely to be experiencing greater life stressors without the resources to overcome them. Participants also appeared to be affected by societal norms of weight with regards to age, gender and the perceived impact of genetics, and negative experiences of healthcare often resulted in complete disengagement.

We were surprised that clear recommendations for specific changes to internal programme aspects were not forthcoming from participants across all levels of attendance, as this was a specific intent of the project. Although factors such as the difficulty of attending programme sessions with shift work and other stressors were identified as a barrier by some participants, there was no clear consensus on factors such as timing and location. While forces external to the service affected engagement, our study indicates that there are opportunities at the service level to facilitate initial and continued engagement in Whānau Pakari, and potentially other services. Despite the negative experiences of participants in the health system (both weight and non-weight related), the care received in Whānau Pakari by deliverers was generally seen as 'different', and a key reason for wanting to continue with the service.

In our study, many participants who declined further engagement after their referral were reluctant to identify their young children as having weight issues and requiring assistance. Past research has identified multiple reasons for parental reluctance to identify overweight in their children,<sup>30</sup> including not recognising obesity as a 'disease' and therefore not warranting the same attention as other health

1  
2  
3 concerns, and wanting to avoid further stigmatising their child. Our data suggests that families are  
4 especially concerned with the mental health of their children, which was often perceived to be more  
5 important than identifying and addressing overweight and was a key reason for declining referrals.  
6  
7 There appears to be a disconnect between the focus on early life intervention due to the expected  
8 growth trajectories of young children with overweight or obesity into obesity in adolescence and  
9 adulthood,<sup>31 32</sup> and the concerns and priorities of parents with young children.  
10  
11  
12  
13  
14  
15

16 Research indicates that parents of girls with overweight or obesity are more likely to enrol them in  
17 healthy lifestyles programmes than families with boys with overweight or obesity.<sup>10</sup> The contrasting  
18 findings of our study, which also included participants who declined their referral, show clear parental  
19 concern for the mental health and self-esteem of their daughters, which may reflect a desire to focus  
20 on positive body image, self-esteem and mental health and avoid increasing body dissatisfaction.<sup>33</sup>  
21 The findings of this study would suggest that the differences in how males and females experience  
22 weight in society contributes towards the differing retention rates between male and female  
23 participants at the service level. It is concerning that two important health issues – overweight and  
24 mental health – are pitted against each other as perceived incongruent concerns, given that both are  
25 significant causes of ill-health among children and adolescents, and suboptimal health-related quality  
26 of life was identified in a previous cohort with weight issues.<sup>2</sup>  
27  
28  
29  
30  
31  
32  
33  
34  
35  
36  
37  
38  
39

40 Puhl and colleagues argue that message framing with regards to terminology is vital in childhood  
41 obesity programmes, in order to prevent further stigmatisation of families seeking help for weight.<sup>34</sup>  
42 While the Whānau Pakari *programme* aims to be non-judgemental and non-stigmatising, it is equally  
43 important that the *referral* to the service is perceived to be non-stigmatising by families in order to  
44 encourage engagement. Given the impact of the referral experience to Whānau Pakari on initial and  
45 continued engagement with the service, the referral process must be respectful and compassionate,  
46 with an acknowledgement of past instances of stigma and discrimination. The sensitivity of weight as  
47 a discussion topic requires non-judgemental language, compassion, and an acknowledgement of the  
48 wider context and potential pressures on the family.<sup>34</sup>  
49  
50  
51  
52  
53  
54  
55  
56  
57  
58  
59  
60

1  
2  
3 As in previous studies,<sup>35</sup> many participants in this study had experienced weight stigma, blame and  
4 judgement from health professionals as well as a societal culture of weight bias. Indigenous  
5 participants often experienced this in addition to varying forms of racism. The impact of racial  
6 discrimination on health care use in NZ is well-documented,<sup>36,37</sup> and the compounding impact of  
7 multiple stigmas is likely to contribute towards differential attendance rates between Māori and NZ  
8 Europeans. Previous weight bias and racism which occurs outside the service may play a role in  
9 participant reluctance to engage with Whānau Pakari. Further research should investigate the role of  
10 racism and weight stigma in engagement with healthcare for weight issues among marginalised ethnic  
11 groups.<sup>38</sup>

### 22 **Strengths and Limitations**

23  
24  
25 The strengths of this study include the large sample size across participants with varying levels of  
26 engagement which allowed for in-depth and broad analysis. In addition, this study included data from  
27 a targeted group of participants (those who declined further contact after referral) whose lack of  
28 contact with the service limits the power of quantitative methods in drawing conclusions, and who are  
29 typically difficult to recruit, as recognised in previous studies.<sup>10</sup> Finally, there was good representation  
30 from families with Māori children who comprised approximately half of the interviews, allowing us to  
31 draw conclusions for a group whose voice is historically absent from obesity research.

32  
33  
34 The main limitation of this study was the lack of child and adolescent voice with regards to their  
35 experiences with Whānau Pakari, as only five interviews included the child or adolescent as a  
36 participant. While it was intended to conduct interviews with families, many parents at recruitment  
37 were reluctant to involve their children due to the sensitivity of material discussed or were unable to  
38 involve them due to timing issues. This meant that children's experiences have mainly been explored  
39 through their parents' accounts, rather than through their own voice. In addition, previous literature  
40 has largely focused on the effect of child/adolescent gender rather than parent gender on perceived  
41 barriers to engagement.<sup>10</sup> In our study, the majority of participants were mothers or female caregivers,  
42 which may have affected the results. Lastly, it is possible that participants were discretionary in what  
43 they chose to share; however, the disclosure of extremely personal and sensitive experiences suggests

1  
2  
3 that any researcher-participant power dynamics were overcome by steps the interviewers took to  
4  
5 mitigate this difference (see COREQ checklist).  
6  
7

## 8 **Conclusions**

9

10 In conclusion, this study found that much of the difference between Whānau Pakari participants who  
11 engaged highly and those who did not engage appeared to be due to the degree to which participants  
12 were affected by the impact of factors at the system and societal levels. Focusing purely on weight in  
13 multicomponent interventions does not acknowledge the complexity of contemporary family life.  
14  
15 However, family-based multidisciplinary intervention programmes such as Whānau Pakari are an  
16 opportunity to acknowledge the wider societal challenges affecting achievement of healthy lifestyle  
17 change. Health professionals and providers can engage in respectful and compassionate care to help  
18 counteract past negative experiences of healthcare. Referral pathways for healthy lifestyle change  
19 programmes need to be as flexible as possible to remove any barriers to engagement, and referrers  
20 need to develop a deeper understanding of the importance of the referral conversation in relation to  
21 weight. Respectful, compassionate care is critical to enhanced retention in programmes, and ongoing  
22 engagement in healthcare services overall.  
23  
24  
25  
26  
27  
28  
29  
30  
31  
32  
33  
34  
35

## 36 *Acknowledgements*

37  
38 The authors acknowledge Dr Donna Cormack (Te Kupenga Hauora Māori) for her contribution to the  
39 research and critical appraisal of the manuscript.  
40  
41  
42

43 Numerous authors within our research group are increasingly aware that the use of terms such as  
44 obesity are contested and increasingly problematic, partly due to the experiences of participants in  
45 terms of weight stigma. We have therefore used this term where it relates to referenced works,  
46 prevalence, and to communicate to the biomedical community, but have used alternate terms  
47 wherever possible to ensure a person-centred approach, prioritising the experience and voice of those  
48 working towards achieving healthy lifestyle change  
49  
50  
51  
52  
53  
54  
55  
56  
57  
58  
59  
60

### *Declarations of interests*

We have read and understood BMJ policy on declaration of interests and declare that we have no competing interests. All authors have completed the Unified Competing Interest form (available on request from the corresponding author) and declare: no support from any organisation for the submitted work; no financial relationships with any organisations that might have an interest in the submitted work in the previous three years, no other relationships or activities that could appear to have influenced the submitted work.

### *Ethics committee approval*

Ethical approval for the Whānau Pakari Barriers and Facilitators study was granted by Central Health and Disability Ethics Committee (NZ) (17/CEN/158/AM01). Written informed consent was obtained from all study participants.

### *Transparency statement*

The lead author affirms that the manuscript is an honest, accurate, and transparent account of the study being reported; that no important aspects of the study have been omitted; and that any discrepancies from the study as originally planned have been explained.

### *Contributorship statement*

CW was involved in study design, data collection, analysis, interpretation, and writing of the manuscript. NR contributed towards study design, data collection and manuscript appraisal. EW contributed towards study design, oversaw analysis and interpretation, and was involved in writing of the manuscript. PH was involved in study design and critical appraisal of the manuscript. YA was involved in study design, analysis, interpretation, and writing of the manuscript.

### *Role of the funding source*

This research was funded by A Better Start National Science Challenge and Cure Kids. The funders had no role in the conduct of the research, study design, collection, analysis and interpretation of data, in the writing of the manuscript and in the decision to submit the article for publication. The researchers are independent from the funders and all had full access to all of the data in the study and can take responsibility for the integrity of the data and the accuracy of the data analysis.



### Data sharing statement

No additional data available.

### References

1. Lakshman R, Elks CE, Ong KK. Childhood obesity. *Circulation* 2012;126(14):1770-9. doi: 10.1161/circulationaha.111.047738 [published Online First: 2012/10/03]
2. Anderson YC, Wynter LE, Treves KF, et al. Assessment of health-related quality of life and psychological well-being of children and adolescents with obesity enrolled in a New Zealand community-based intervention programme: an observational study. *BMJ Open* 2017;7(8) doi: 10.1136/bmjopen-2016-015776
3. Anderson YC, Wynter LE, Butler MS, et al. Dietary Intake and Eating Behaviours of Obese New Zealand Children and Adolescents Enrolled in a Community-Based Intervention Programme. *PLoS ONE* 2016;11(11):e0166996. doi: 10.1371/journal.pone.0166996
4. Anderson YC, Wynter LE, Grant CC, et al. Physical activity is low in obese New Zealand children and adolescents. *Sci Rep* 2017;7:41822. doi: 10.1038/srep41822
5. Anderson YC, Wynter LE, Treves KF, et al. Prevalence of comorbidities in obese New Zealand children and adolescents at enrolment in a community-based obesity programme. *J Paediatr Child Health* 2016;52(12):1099-105. doi: 10.1111/jpc.13315
6. World Health Organization. Report of the Commission on Ending Childhood Obesity. Geneva, Switzerland: World Health Organization, 2016.
7. O'Connor EA, Evans CV, Burda BU, et al. Screening for Obesity and Intervention for Weight Management in Children and Adolescents: Evidence Report and Systematic Review for the US Preventive Services Task Force. *Jama* 2017;317(23):2427-44. doi: 10.1001/jama.2017.0332 [published Online First: 2017/06/21]
8. Skelton JA, Beech BM. Attrition in paediatric weight management: a review of the literature and new directions. *Obesity reviews : an official journal of the International Association for the Study of Obesity* 2011;12(5):e273-81. doi: 10.1111/j.1467-789X.2010.00803.x [published Online First: 2010/10/01]
9. Swinburn BA, Sacks G, Hall KD, et al. The global obesity pandemic: shaped by global drivers and local environments. *The Lancet* 2011;378(9793):804-14. doi: 10.1016/S0140-6736(11)60813-1
10. Kelleher E, Davoren MP, Harrington JM, et al. Barriers and facilitators to initial and continued attendance at community-based lifestyle programmes among families of overweight and obese children: a systematic review. *Obesity reviews : an official journal of the International Association for the Study of Obesity* 2017;18(2):183-94. doi: 10.1111/obr.12478
11. Perry RA, Daniels LA, Bell L, et al. Facilitators and Barriers to the Achievement of Healthy Lifestyle Goals: Qualitative Findings From Australian Parents Enrolled in the PEACH Child

- 1  
2  
3 Weight Management Program. *J Nutr Educ Behav* 2017;49(1):43-52.e1. doi:  
4 10.1016/j.jneb.2016.08.018  
5  
6 12. Anderson YC, Wynter LE, Moller KR, et al. The effect of a multi-disciplinary obesity  
7 intervention compared to usual practice in those ready to make lifestyle changes: design and  
8 rationale of Whānau Pakari. *BMC obesity* 2015;2:41. doi: 10.1186/s40608-015-0068-y  
9 [published Online First: 2015/10/16]  
10  
11 13. Anderson Y, Wynter L, Grant C, et al. A novel home-based intervention for child and adolescent  
12 obesity: the results of the Whānau Pakari randomized controlled trial. *Obesity*  
13 2017;25(11):1965-73.  
14  
15 14. Anderson Y, Wynter L, O'Sullivan N, et al. Two-year outcomes of Whānau Pakari, a multi-  
16 disciplinary assessment and intervention for children and adolescents with weight issues: a  
17 randomised clinical trial: *Pediatric Obesity*, 2020.  
18  
19 15. Anderson Y. Whānau Pakari: a multi-disciplinary intervention for children and adolescents with  
20 weight issues [PhD thesis]. University of Auckland, 2018.  
21  
22 16. Wild CEK, O'Sullivan NA, Lee AC, et al. Survey of Barriers and Facilitators to Engagement in a  
23 Multidisciplinary Healthy Lifestyles Program for Children. *Journal of Nutrition Education*  
24 *and Behavior* 2019 doi: 10.1016/j.jneb.2019.10.010 [published Online First: November 26,  
25 2019]  
26  
27 17. Reid P, Paine SJ, Curtis E, et al. Achieving health equity in Aotearoa: strengthening  
28 responsiveness to Maori in health research. *The New Zealand medical journal*  
29 2017;130(1465):96-103. [published Online First: 2017/11/10]  
30  
31 18. Valencia RR. The evolution of deficit thinking: Educational thought and practice: Routledge  
32 2012.  
33  
34 19. Curtis E. Indigenous Positioning in Health Research: The importance of Kaupapa Māori theory-  
35 informed practice. *AlterNative* 2016;12(4):396-410.  
36  
37 20. Glover M, Kira A, Johnston V, et al. A systematic review of barriers and facilitators to  
38 participation in randomized controlled trials by Indigenous people from New Zealand,  
39 Australia, Canada and the United States. *Glob Health Promot* 2014;0(0):1757.  
40  
41 21. Anderson Y, Wild C, Hofman P, et al. Participant and caregivers' experiences of a multi-  
42 disciplinary programme for healthy lifestyle change in Aotearoa/New Zealand. *Health*  
43 *Promotion International* 2019;In Review  
44  
45 22. Cole TJ. A chart to link child centiles of body mass index, weight and height. *Eur J Clin Nutr*  
46 2002;56(12):1194-99.  
47  
48 23. Ministry of Health NZ. HISO 10001:2017 Ethnicity Data Protocols, 2017.  
49  
50 24. MAXQDA 2018 [program]. Berlin, Germany: VERBI Software, 2018.  
51  
52 25. Braun V, Clarke V. Using thematic analysis in psychology. *Qual Res Psychol* 2006;3(2):77-101.  
53  
54  
55  
56  
57  
58  
59  
60

- 1  
2  
3 26. Braun V, Clarke V. Reflecting on reflexive thematic analysis. *Qualitative Research in Sport,*  
4 *Exercise and Health* 2019;11(4):589-97. doi: 10.1080/2159676X.2019.1628806  
5  
6 27. Airini DBC, Elana; Johnson, Odie; Luatua, Fred, O'Shea, Mona; Rakena, Te Oti; Reynolds,  
7 Gillian; Sauni, Pale; Smith, Angie; Huirua, To'aiga Su'a; Tarawa, Matt; Ulugia-Pua, Meryl;.   
8 Success for all: Improving Māori and Pasifika student success in degree-level studies.  
9 Auckland, 2009.  
10  
11 28. Curtis ET, Wikaire E, Lualua-Aati T, et al. Tātou tātou/success for all: Improving Māori student  
12 success. Wellington: Ako Aotearoa National Centre for Tertiary Teaching Excellence, 2012.  
13  
14 29. Atkinson J, Salmond C, Crampton P. NZDep2013 Index of Deprivation. Wellington (NZ):  
15 Department of Public Health, University of Otago, 2014.  
16  
17 30. Towns N, D'Auria J. Parental Perceptions of Their Child's Overweight: An Integrative Review of  
18 the Literature. *Journal of Pediatric Nursing* 2009;24(2):115-30. doi:  
19 <https://doi.org/10.1016/j.pedn.2008.02.032>  
20  
21 31. Geserick M, Vogel M, Gausche R, et al. Acceleration of BMI in Early Childhood and Risk of  
22 Sustained Obesity. *New England Journal of Medicine* 2018;379(14):1303-12. doi:  
23 10.1056/NEJMoa1803527  
24  
25 32. Childhood Obesity Plan Wellington: Ministry of Health, New Zealand; [updated 24 April 2019;  
26 cited 2019 12 November 2019]. Available from: [https://www.health.govt.nz/our-](https://www.health.govt.nz/our-work/diseases-and-conditions/obesity/childhood-obesity-plan)  
27 [work/diseases-and-conditions/obesity/childhood-obesity-plan](https://www.health.govt.nz/our-work/diseases-and-conditions/obesity/childhood-obesity-plan).  
28  
29 33. Puhl R, Brownell KD. Bias, Discrimination, and Obesity. *Obesity Research* 2001;9(12):788-805.  
30 doi: 10.1038/oby.2001.108  
31  
32 34. Puhl RM, Latner JD. Stigma, obesity, and the health of the nation's children. *Psychological*  
33 *bulletin* 2007;133(4):557-80. doi: 10.1037/0033-2909.133.4.557 [published Online First:  
34 2007/06/27]  
35  
36 35. Smith KL, Straker LM, McManus A, et al. Barriers and enablers for participation in healthy  
37 lifestyle programs by adolescents who are overweight: a qualitative study of the opinions of  
38 adolescents, their parents and community stakeholders. *BMC Pediatrics* 2014;14(1):53. doi:  
39 10.1186/1471-2431-14-53  
40  
41 36. Harris RB, Cormack DM, Stanley J. Experience of racism and associations with unmet need and  
42 healthcare satisfaction: the 2011/12 adult New Zealand Health Survey. *Aust N Z J Public*  
43 *Health* 2019;43(1):75-80. doi: 10.1111/1753-6405.12835 [published Online First:  
44 2018/10/09]  
45  
46 37. Harris R, Cormack D, Tobias M, et al. The pervasive effects of racism: experiences of racial  
47 discrimination in New Zealand over time and associations with multiple health domains.  
48 *Social science & medicine (1982)* 2012;74(3):408-15. doi: 10.1016/j.socscimed.2011.11.004  
49 [published Online First: 2011/12/30]  
50  
51  
52  
53  
54  
55  
56  
57  
58  
59  
60

1  
2  
3 38. Wild CE, Rawiri N, Willing EJ, et al. What affects programme engagement for Māori families? A  
4 qualitative study of a family-based, multidisciplinary healthy lifestyle programme for children  
5 and adolescents. Forthcoming 2020  
6  
7  
8  
9  
10  
11  
12

13 Figure One: The three interacting factors that influence participant engagement in Whānau Pakari.  
14 Respectful, compassionate care can partially mitigate the effects of these determinants.  
15  
16  
17  
18  
19  
20  
21  
22  
23  
24  
25  
26  
27  
28  
29  
30  
31  
32  
33  
34  
35  
36  
37  
38  
39  
40  
41  
42  
43  
44  
45  
46  
47  
48  
49  
50  
51  
52  
53  
54  
55  
56  
57  
58  
59  
60

For peer review only



review only

1  
2  
3  
4  
5  
6  
7  
8  
9  
10  
11  
12  
13  
14  
15  
16  
17  
18  
19  
20  
21  
22  
23  
24  
25  
26  
27  
28  
29  
30  
31  
32  
33  
34  
35  
36  
37  
38  
39  
40  
41  
42  
43  
44  
45  
46  
47  
48  
49  
50  
51  
52  
53  
54  
55  
56  
57  
58  
59  
60

## COREQ (Consolidated criteria for reporting qualitative research)

This checklist is intended to supplement the manuscript by providing further detail on methodology.

### Domain 1: Research team and reflexivity

#### *Personal characteristics*

##### 1. Interviewers

Cervantée Wild & Ngauru Rawriri conducted the interviews (page 8).

##### 2. Credentials and 3. Occupation (page 1)

Cervantée Wild (BHSc(Hons), BA) – PhD candidate, Liggins Institute, University of Auckland

Ngauru Rawiri – BHSc student, Te Reo Māori teacher (tertiary level) and interview facilitator, Liggins Institute, University of Auckland

Paul Hofman (MbChB, Dip Obs, FRACP) – Professor and paediatric endocrinologist

Esther Willing (PhD) – Lecturer in Hauora Māori, Kōhatu – Centre for Hauora Māori, University of Otago

Yvonne Anderson (PhD, Dip Paeds, MBChB, FRACP, BSc [Psych]) – Senior research fellow and paediatrician

##### 4. Gender & ethnicity

CW – female, New Zealand European

NR – female, Māori (Ngāti Mutunga, Ngāti Tama, Ngāti Rāhiri o Te Ati Awa me Ngai Tūhoe)

PH – male, New Zealand European

EW – female, Māori (Ngāti Toarangatira, Ngāti Koata me Ngā Ruahine)

YA – female, New Zealand European

##### 5. Experience and training

CW had qualitative research training through the PhD (supervised by PH, EW, and YA). NR had interview experience through her career. PH is an experienced researcher in child health and endocrinology. EW is an experienced qualitative researcher and has extensive experience in Māori health research. YA is an experienced researcher in child health, especially childhood obesity.

#### *Relationship with participants*

## 6. Relationship established

All participants were recruited as described below, and some were already known to NR through relationship networks.

## 7. Participant knowledge of the interviewer

The participants knew the reasons for conducting the research (detailed in the patient information and consent form), and participants were aware that the study would specifically ask about the factors that contributed to their decisions to engage or not engage, in order to improve the service. Participants were also aware that the interviewers were separate and distinct from the clinical service team.

## 8. Interviewer characteristics

NR is a Māori researcher (of Ngāti Mutunga, Ngāti Tama, Ngāti Rāhiri o Te Ati Awa and Ngai Tūhoe descent) and CW is New Zealand European. This mixed Indigenous – non-Indigenous partnership allowed us to connect and establish rapport with participants, depending on the interview participant and context. NR's role as a parent had the advantage that familiarity with this stage of life helped her understand participants' stories and ask exploratory questions.

## Domain 2: Study design

### *Theoretical framework*

## 9. Methodological orientation and Theory

The research approach was informed by Kaupapa Māori theory. The approach was developed to minimise any perceived power imbalances between the interview team and the participants and make the interview experience as comfortable as possible. We used thematic analysis to analyse the interviews (page 7).

### *Participant selection*

## 10. Sampling and 11. Method of approach

We identified eligible potential participants who fit the criteria, and then stratified these participants into groups by engagement level and ethnicity. We then randomised the list of potential participants in each group, and then contacted each participant one by one (stratified random sampling). Participants were recruited by telephone and interviewed in person over a six-month period from June to December 2018 (page 8).

## 12. Sample size

For funding and resource reasons, we had a maximum total of 74 potential interviews with families. We conducted 64 interviews in total (page 10).

## 13. Non-participation

We approached 136 families, of which 53 were uncontactable, 7 agreed but were unable to be interviewed as they had moved out of the region, and 12 declined because they were not interested, were too busy with work, or did not remember the referral (page 11).

### *Setting*

1  
2  
3 14. Setting of data collection  
4

5 Participants were interviewed in person at their home, workplace, or at a local community child  
6 health centre. All participants chose where they would prefer to be interviewed (page 8).  
7

8 15. Presence of non-participants  
9

10 For most interviews, only the participant and interviewers were present, but there were occasionally  
11 other family members present, such as young children (<5 years) (page 8-9)  
12

13 16. Description of sample  
14

15 Half the interviews were with families with Māori children. Most (80%) were solely with a female  
16 parent/caregiver (13 interviews included male parents and/or caregivers). 11 interviews involved  
17 two or more family members. 5 interviews included a child participant (page 10).  
18

19 *Data collection*  
20

21 17. Interview guide  
22

23 A semi-structured interview framework was used and adjusted for relevance as each interview  
24 progressed. It was not pilot tested. The guide has been included as supplementary material.  
25

26 18. Repeat interviews  
27

28 Repeat interviews were not conducted, but participants were offered their transcripts for review  
29 after the interview (page 9).  
30

31 19. Audio recording  
32

33 Interviews were audiotaped digitally and transcribed by a medical typist (page 9).  
34

35 20. Field notes  
36

37 Field notes were made after each interview and kept as part of a reflexive notes.  
38

39 21. Duration  
40

41 Interview audio recordings ranged from nine minutes to 107 minutes (mean 31 minutes).  
42

43 22. Data saturation  
44

45 Data saturation was reached in each group of participants in each level of engagement.  
46

47 23. Transcripts returned  
48

49 Transcripts were anonymised and returned to the participant for checking, including deletions of  
50 portions if desired (page 9).  
51

52  
53 **Domain 3: analysis and findings**  
54

55 *Data analysis*  
56

57 24. Number of data coders  
58  
59  
60



1  
2  
3 Eight transcripts were independently coded by CW and EW and discussed for consistency. After the  
4 coding matrix was constructed and consensus on codes reached, all transcripts were coded again by  
5 CW.  
6

#### 7 25. Description of the coding tree

8  
9 A 'mind map' was used instead of a coding tree in order to better capture complexity and avoid an  
10 artificial hierarchy that did not adequately represent the inter-relationships between the themes,  
11 since themes could become more major or minor depending on the context.  
12

#### 13 26. Derivation of themes

14  
15 Themes were derived from the data according to Braun and Clarke's 2006 and 2019 method for  
16 reflexive thematic analysis (page 9).  
17

#### 18 27. Software

19  
20 MAXQDA software was used to manage the data (page 9).  
21

#### 22 28. Participant checking

23  
24 Participants did not provide feedback on the findings.  
25  
26  
27

### 28 *Reporting*

#### 29 29. Quotations presented

30  
31 Participant quotations are presented in Panel 1 and throughout the manuscript. They are not  
32 identified by participant number (page 11-12).  
33  
34

#### 35 30. Data and findings consistent

36  
37 There was good consistency between data and findings, with the two interviewers working to  
38 discuss findings and the wider research team providing critique and challenging interpretations of  
39 data (page 9).  
40

#### 41 31. and 32. Clarity of major and minor themes

42  
43 A distinction was made between 'major' and 'minor' themes with sub-themes capturing the range of  
44 participant experiences under each major theme. However, even major themes could not be cleanly  
45 separated, reflecting real-world complexity.  
46  
47  
48

49 Reference: Tong A, Sainsbury P, Craig J. Consolidated criteria for reporting qualitative research  
50 (COREQ): a 32-item checklist for interviews and focus groups. *Int J Qual Health Care* 2007; 19, 349–  
51 357. doi: 10.1093/intqhc/mzm042  
52

53 NB. This checklist has been amended to capture ethnicity and gender breakdown, to reflect the  
54 composition of the research team.  
55  
56  
57  
58  
59  
60

## SUPPLEMENTARY MATERIAL: Interview schedule

*NB. Interviews were semi-structured and this schedule is simply a guide to the line of interview questioning. Not all questions were asked if not appropriate. Sections marked with an asterisk (\*) were not asked of participants who declined involvement in the programme.*

### Referral & initial thoughts

- Who referred you to Whānau Pakari?
- Do you remember how they told you about the programme? *(if not self-referral)*
- Did they talk with you and your child?
- How did you feel about being referred? How did you talk to your child/children about the programme and referral?
- Why did you decide to accept the referral?
- How did you feel about starting the programme?
- Which part of the programme (if any) were you more interested in, or seemed more relevant for you and/or your family?
- Were you worried about what other people might think about you and your family attending Whānau Pakari?

### Overall experience \*

- Which parts of the programme were the most helpful?
- Which parts of the programme did you find were more difficult?
- Did Whānau Pakari meet your needs in supporting you to make healthy lifestyle changes as a family? Why/why not?
- Did Whānau Pakari meet your expectations in terms of what you thought the team would provide? How did/didn't they do this?
- Would you recommend Whānau Pakari to other families and why/why not?

### Barriers and facilitators \*

- What were the things that helped you to or made you want to continue to attend Whānau Pakari sessions, if any?
- What were the things that made it hard for you to continue to attend Whānau Pakari, if any?
- Did you experience any travel barriers to get to the sessions? E.g. location, access to car, parking, petrol, WOF, rego
- The Healthy Lifestyles Coordinator came to you for the assessments. What were the good things about a home visit? (If any) What were the negative things? (If any)
- Do you prefer home-based assessments rather than coming to the hospital/clinic?
- Were you able to involve the rest of your children and family in the programme sessions.

- How much of a priority was Whānau Pakari in relation to your other demands?
- How did other competing demands, obligations or choices impact on your decision to attend Whānau Pakari?
- Can you please describe how Whānau Pakari was (or wasn't) suitable for families like yours?
- Was Whānau Pakari family-friendly, inviting, comfortable? What could be done to improve this?
- Can you please tell me how costs may or may not have been barriers to participation in Whānau Pakari? How?
- Can you tell me about any other barriers to participation in Whānau Pakari that you experienced?
- Can you think of things that might have motivated you or your whānau to participate (or things that kept you from participating)?

### **Beliefs and feelings around healthy lifestyle programmes**

- What do you think about healthy lifestyle programmes in general?

### **Previous experiences with health system**

- In general, can you describe what your experiences with the health system have been like prior to the Whānau Pakari programme?
- Have you ever felt that you or your family have been treated unfairly in the health system? If yes, why do you think that this happened?
- In your experiences with the health system, have you ever experienced discrimination? If yes, can you tell me a bit more about this? Why do you think this happened?
- Have any of you or your family's previous experiences with the health system influenced your decision to attend Whānau Pakari? If yes, how?
- Have you had any previous negative experiences with health providers that made you choose not to attend Whānau Pakari sessions?

### **Previous experiences with societal stigma**

- In your day-to-day life, have you ever been treated unfairly or discriminated against? If yes, can you tell me a bit more about this? Why do you think this happened?
- Have you ever witnessed or heard about other members of your whānau being treated unfairly or discriminated against for any reason? If yes, can you tell me a bit more about this?
- Do you think any of these experiences influenced your decisions or ability to attend, engage, participate or continue participation in Whānau Pakari?

### Follow-up prompt guidelines

Prompts are to keep the momentum of the interview by being positive, affirming answers and using active listening without being leading.

- Prompts included:
  - Non-verbal nods
  - Affirming sounds e.g. Mmmm
  - Agreement e.g. yes, that's interesting
  - Questions e.g. "what did you mean by that?", repeat the last word the participant said as a question to prompt more explanation.
  - To get back on track: "Could I ask you about something you said before..."

For peer review only

# BMJ Open

## Determining barriers and facilitators to engagement for families in a family-based multicomponent healthy lifestyles intervention for children and adolescents: a qualitative study

|                                 |                                                                                                                                                                                                                                                                                                                                                                                                                              |
|---------------------------------|------------------------------------------------------------------------------------------------------------------------------------------------------------------------------------------------------------------------------------------------------------------------------------------------------------------------------------------------------------------------------------------------------------------------------|
| Journal:                        | <i>BMJ Open</i>                                                                                                                                                                                                                                                                                                                                                                                                              |
| Manuscript ID                   | bmjopen-2020-037152.R2                                                                                                                                                                                                                                                                                                                                                                                                       |
| Article Type:                   | Original research                                                                                                                                                                                                                                                                                                                                                                                                            |
| Date Submitted by the Author:   | 17-Jul-2020                                                                                                                                                                                                                                                                                                                                                                                                                  |
| Complete List of Authors:       | Wild, Cervantée; The University of Auckland Liggins Institute, Rawiri, Ngauru; The University of Auckland Liggins Institute<br>Willing, Esther; University of Otago, Kōhatu – Centre for Hauora Māori<br>Hofman, Paul; The University of Auckland Liggins Institute; Starship Children's Health<br>Anderson, Yvonne; The University of Auckland Liggins Institute; Taranaki District Health Board, Department of Paediatrics |
| <b>Primary Subject Heading</b>: | Health services research                                                                                                                                                                                                                                                                                                                                                                                                     |
| Secondary Subject Heading:      | Paediatrics, Qualitative research                                                                                                                                                                                                                                                                                                                                                                                            |
| Keywords:                       | PAEDIATRICS, Community child health < PAEDIATRICS, QUALITATIVE RESEARCH                                                                                                                                                                                                                                                                                                                                                      |
|                                 |                                                                                                                                                                                                                                                                                                                                                                                                                              |

SCHOLARONE™  
Manuscripts



I, the Submitting Author has the right to grant and does grant on behalf of all authors of the Work (as defined in the below author licence), an exclusive licence and/or a non-exclusive licence for contributions from authors who are: i) UK Crown employees; ii) where BMJ has agreed a CC-BY licence shall apply, and/or iii) in accordance with the terms applicable for US Federal Government officers or employees acting as part of their official duties; on a worldwide, perpetual, irrevocable, royalty-free basis to BMJ Publishing Group Ltd ("BMJ") its licensees and where the relevant Journal is co-owned by BMJ to the co-owners of the Journal, to publish the Work in this journal and any other BMJ products and to exploit all rights, as set out in our [licence](#).

The Submitting Author accepts and understands that any supply made under these terms is made by BMJ to the Submitting Author unless you are acting as an employee on behalf of your employer or a postgraduate student of an affiliated institution which is paying any applicable article publishing charge ("APC") for Open Access articles. Where the Submitting Author wishes to make the Work available on an Open Access basis (and intends to pay the relevant APC), the terms of reuse of such Open Access shall be governed by a Creative Commons licence – details of these licences and which [Creative Commons](#) licence will apply to this Work are set out in our licence referred to above.

Other than as permitted in any relevant BMJ Author's Self Archiving Policies, I confirm this Work has not been accepted for publication elsewhere, is not being considered for publication elsewhere and does not duplicate material already published. I confirm all authors consent to publication of this Work and authorise the granting of this licence.

1  
2  
3 **Determining barriers and facilitators to engagement for families in a family-based**  
4 **multicomponent healthy lifestyles intervention for children and adolescents: a qualitative study**  
5  
6

7 Cervantée EK Wild, Ngauru Rawiri, Esther J Willing, Paul L Hofman, Yvonne C Anderson  
8  
9

10  
11  
12  
13 **Author addresses and positions**  
14

15  
16 Cervantée Wild  
17

18  
19 Liggins Institute, University of Auckland, 85 Park Road, Grafton, Auckland 1023, New Zealand.  
20

21  
22 [cervantee.wild@auckland.ac.nz](mailto:cervantee.wild@auckland.ac.nz)  
23

24  
25 [cervantee.wild@tdhb.org.nz](mailto:cervantee.wild@tdhb.org.nz)  
26

27  
28 PhD candidate  
29

30  
31  
32  
33 Ngauru Rawiri  
34

35  
36 Liggins Institute, University of Auckland, 85 Park Road, Grafton, Auckland 1023, New Zealand.  
37

38  
39 [nanurawiri@gmail.com](mailto:nanurawiri@gmail.com)  
40

41  
42 Interview facilitator  
43

44  
45  
46  
47 Esther J Willing  
48

49  
50 Kōhatu – Centre for Hauora Māori, University of Otago, 362 Leith Street, North Dunedin, Dunedin  
51

52  
53 9016, New Zealand.  
54

55  
56 [esther.willing@otago.ac.nz](mailto:esther.willing@otago.ac.nz)  
57

58  
59 Lecturer  
60

1  
2  
3 Paul L Hofman  
4

5  
6 Liggins Institute, University of Auckland, 85 Park Road, Grafton, Auckland 1023, New Zealand.  
7

8  
9 Professor  
10

11 Starship Children's Hospital, Auckland District Health Board, 2 Park Road, Grafton, Auckland 1023,  
12  
13 New Zealand.  
14

15  
16 [p.hofman@auckland.ac.nz](mailto:p.hofman@auckland.ac.nz)  
17

18  
19 Paediatric endocrinologist  
20  
21  
22  
23  
24

25 Yvonne C Anderson  
26

27 Department of Paediatrics: Child and Youth Health, Faculty of Medical and Health Sciences and  
28  
29 Liggins Institute, University of Auckland, 85 Park Road, Grafton, Auckland 1023, New Zealand.  
30

31  
32 Senior Lecturer and Research Fellow  
33

34  
35 Department of Paediatrics, Taranaki District Health Board, David Street, Westown, New Plymouth  
36  
37 4310, New Zealand.  
38

39  
40 [y.anderson@auckland.ac.nz](mailto:y.anderson@auckland.ac.nz)  
41

42  
43 Paediatrician  
44  
45  
46  
47

48 **Correspondence to:**  
49

50  
51 Cervantée Wild  
52

53  
54 Liggins Institute, University of Auckland  
55

56  
57 85 Park Road, Grafton  
58

59  
60 Auckland, New Zealand



1  
2  
3 cervantee.wild@auckland.ac.nz  
4  
5

6 *The Corresponding Author has the right to grant on behalf of all authors and does grant on behalf of*  
7 *all authors, an exclusive licence (or non exclusive for government employees) on a worldwide basis to*  
8 *the BMJ Publishing Group Ltd to permit this article (if accepted) to be published in BMJ editions and*  
9 *any other BMJ PGL products and sublicences such use and exploit all subsidiary rights, as set out in*  
10 *our licence.*  
11  
12  
13  
14  
15  
16  
17  
18  
19  
20  
21  
22  
23  
24  
25  
26  
27  
28  
29  
30  
31  
32  
33  
34  
35  
36  
37  
38  
39  
40  
41  
42  
43  
44  
45  
46  
47  
48  
49  
50  
51  
52  
53  
54  
55  
56  
57  
58  
59  
60

For peer review only

## ABSTRACT

**Objectives:** Recruitment and retention in child and adolescent healthy lifestyle intervention services for childhood obesity is challenging, and inequalities across social groups are persistent. This study aimed to understand the barriers and facilitators to engagement in a multicomponent assessment-and-intervention healthy lifestyle programme for children and their families, based in the home and community.

**Design:** Qualitative interview-based study of past users (n=76) of a family-based multicomponent healthy lifestyle programme in a mixed urban-rural region of New Zealand. Semi-structured, home-based interviews were conducted and thematically analysed with peer debriefing for validity.

**Participants:** Families were selected through stratified random sampling to include a range of levels of engagement, including those who declined their referral, with equal numbers of interviews with Indigenous and non-Indigenous families.

**Results:** Three interactive and compounding determinants were identified as influencing engagement in Whānau Pakari: acute and chronic life stressors, societal norms of weight and body size, and historical experiences of healthcare. These determinants were present across societal, system and healthcare service levels. A negative referral experience to Whānau Pakari often resulted in participants declining further input or disengaging from the programme. A fourth domain, respectful and compassionate healthcare, was identified as a mitigator of these three themes, facilitating participant engagement despite previous negative experiences.

**Conclusions:** While participant engagement in healthy lifestyle programmes is affected by determinants which appear to operate outside immediate service provision, the programme is an opportunity to acknowledge past instances of stigma and the wider challenges of healthy lifestyle change. The experience of the referral to Whānau Pakari is important for setting the scene for future engagement in the programme. Respectful, compassionate care is critical to enhanced retention in multidisciplinary healthy lifestyle programmes and ongoing engagement in healthcare services overall.

### Strengths and limitations of this study

- Large sample size (64 interviews with 76 total participants)
- Sample included wide range of participants with varying levels of engagement, including non-service users
- Equal representation from families with Māori and non-Māori children
- Lack of child and adolescent voice
- Participants may not have fully disclosed their experiences to interviewers

### Introduction

Excess weight in childhood and adolescence affects physical, psychological and social health and well-being, and is a known risk factor for comorbidities both in childhood and adulthood.<sup>1</sup> Children with weight issues in Aotearoa/New Zealand (henceforth referred to as New Zealand) demonstrate a high prevalence of weight-related comorbidities, as well as low physical activity, suboptimal eating behaviours, and low health-related quality of life.<sup>2-5</sup> One of the key recommendations of the World Health Organization's Report of the Commission on Ending Childhood Obesity is to "provide family-based, multicomponent lifestyle weight management services for children and young people who are obese".<sup>6</sup> A systematic review and meta-analysis found that a minimum of 26 hours of contact time in lifestyle interventions is associated with improvements in weight status in children and adolescents.<sup>7</sup> However, as with any service attempting to facilitate lifestyle change, success relies on continued family engagement.<sup>8</sup> It is also important that such multidisciplinary services – and other health professionals addressing childhood obesity in a primary care setting – are able to engage with groups most affected by obesity, namely those living in the most deprived areas and ethnic minorities.<sup>9</sup>

Improving *engagement* with childhood obesity services requires addressing both initial recruitment and ongoing retention.<sup>8</sup> Service, system and society-related factors may *enable* or *inhibit* initial and ongoing engagement; factors which are also referred to as facilitators and barriers.<sup>10 11</sup> Kelleher and colleagues' review of the factors affecting attendance at community-based lifestyle programmes found that weight stigma, parental reluctance to identify overweight and logistical challenges were

1  
2  
3 key barriers to initial and ongoing attendance.<sup>10</sup> Under-represented in the literature are those who  
4 declined treatment altogether, as many past studies had low recruitment from these families. It is  
5 therefore important to understand the experiences of families experiencing childhood obesity in order  
6 to improve initial recruitment and ongoing retention in healthy lifestyle services, particularly for  
7 groups most affected.<sup>10</sup>  
8  
9  
10  
11  
12

13  
14 Whānau Pakari is a family-centred, community-based assessment and intervention programme for  
15 children and their families, based in Taranaki, a mixed urban-rural region of New Zealand (NZ). The  
16 name means 'healthy, self-assured families that are fully active'. The focus of the programme is on  
17 healthy lifestyle change rather than weight loss or obesity, in order to minimise judgement and  
18 weight-related stigma. The multidisciplinary service involves a home-based medical assessment with  
19 advice, removing the hospital appointment in order to *demedicalise* care, and includes weekly  
20 nutrition, physical activity and psychology sessions. This approach takes healthcare outside hospital  
21 walls and into the community, without compromising quality of care. A randomised clinical trial of  
22 the Whānau Pakari model of care demonstrated modest reductions in body mass index (BMI) standard  
23 deviation score (SDS) and improvements in cardiovascular fitness and health-related quality of life.<sup>12</sup>  
24  
25  
26  
27  
28  
29  
30  
31  
32  
33  
34  
35  
36  
37  
38  
39  
40  
41  
42  
43  
44  
45  
46  
47  
48  
49  
50  
51  
52  
53  
54  
55  
56  
57  
58  
59  
60

<sup>13</sup> Greatest improvements in BMI SDS were found in those who attended the recommended  $\geq 70\%$  of  
intense intervention sessions.<sup>13 14</sup> However, Māori (NZ's Indigenous population) and females were  
less likely to attend  $\geq 70\%$  of sessions, with sustained retention in the programme favouring males and  
NZ Europeans.<sup>13</sup>

Previous evaluation of the experiences of Whānau Pakari participants and their caregivers has shown  
the programme to be a positive and beneficial experience for those involved, emphasising the  
importance of connectedness, knowledge-sharing and self-determination, the collective journey  
alongside other families and programme deliverers, and the importance of a non-judgemental,  
respectful environment.<sup>15</sup> A survey of past participants of Whānau Pakari indicated that previous  
experiences of healthcare may influence subsequent engagement with health services, particularly for  
Māori,<sup>16</sup> although this was not elaborated on further by participants. These findings were limited by  
the survey's relatively small sample size and the lack of representation from participants who declined

1  
2  
3 intervention. Therefore, the objective of the present study was to understand barriers and facilitators  
4  
5 to initial attendance and ongoing retention in the Whānau Pakari programme.  
6  
7

## 8 *Methods*

### 9 *Design*

10  
11 In NZ, health research is required to be responsive to the needs and diversity of Māori.<sup>17</sup> The study  
12  
13 design and research approach was informed by Kaupapa Māori methodological principles. Kaupapa  
14  
15 Māori theory is a methodology which resists persistent power imbalances and the continued use of  
16  
17 cultural deficit theory (attributing poor health to something inherent to a ‘culture’) to explain  
18  
19 inequities between Māori and non-Māori,<sup>17 18</sup> and is aligned with a social and structural determinants  
20  
21 of health framework.<sup>19</sup> As a methodological approach, Kaupapa Māori research centres Māori voice  
22  
23 and experience, and prioritises understanding people within their contexts and whānau (families).<sup>19</sup> It  
24  
25 was hoped that this approach would reduce many of the known barriers to research participation for  
26  
27 Indigenous peoples, and enable participants to engage positively in the research process.<sup>20</sup> While  
28  
29 Kaupapa Māori research can use both quantitative and qualitative methods, in this study, a qualitative  
30  
31 research design was chosen in order to ensure that priority was given to ensuring the voices and  
32  
33 experiences of Māori participants were understood in this study.  
34  
35  
36

37  
38 In-depth interviews, centring on participant experience with Whānau Pakari and wider experiences of  
39  
40 the health system, were undertaken. A specific focus was to understand the barriers to attendance and  
41  
42 retention at varying levels of engagement in Whānau Pakari, including those who declined their  
43  
44 referral and had no further contact with the programme. Factors which facilitated both initial and  
45  
46 ongoing engagement were explored.  
47  
48

49  
50 Ethical approval for the Whānau Pakari Barriers and Facilitators study was granted by Central Health  
51  
52 and Disability Ethics Committee (NZ) (17/CEN/158/AM01). Written informed consent was obtained  
53  
54 from all study participants, or informed assent with proxy parental consent in the case of the child and  
55  
56 adolescent participants aged under 16 years.  
57  
58  
59  
60

### *Patient and Public Involvement statement*

Participants were first involved in the research at the recruitment stage, although some participants had been involved in an earlier related randomised clinical trial.<sup>12</sup> The research questions were informed by the experiences of participants voiced, unsolicited, during clinical assessment during the previous trial and in previous focus group research.<sup>15</sup> The design of the research drew from Kaupapa Māori theory, which informed the research process in order to prioritise the experiences and preferences of participants. The dissemination process to participants was altered as a result of participant preference to receive feedback via a summary video, rather than at a group meeting. Participants were not asked to assess the burden of the time required to participate in the research.

### *Participants*

Eligible participants were parents and/or caregivers of children and adolescents who had been referred to the service from January 2012 to January 2017. Children and adolescents over 11 years of age were also invited to participate. The eligibility criteria for referral to the service are children aged 4 to 16 years, identified as having obesity [body mass index (BMI)  $\geq 98^{\text{th}}$  centile], or overweight (BMI  $> 91^{\text{st}}$  centile) with associated weight-related comorbidities.<sup>12 21</sup>

Participants were recruited from four different groups of Whānau Pakari service users who had varying levels of engagement (Table 1) using stratified random sampling. Recruitment was via telephone call and text message. The sample contained equal numbers of families with Māori and non-Māori children to ensure appropriate representation of Indigenous children's experiences.

### *Data collection*

The semi-structured interviews were approximately 30-60 minutes in duration and conducted by CW and NR together where possible (see supplementary file for interview schedule). NR led the interviews with Māori families when appropriate. Interviews took place in the participant home or alternative locations chosen by the participant (including a hospital, participant workplaces, and a community library) in order to minimise inconvenience and travel barriers. Most interviews were undertaken with one participant (the parent or caregiver) but a portion included two or more family

1  
2  
3 members, including children (Table 1). A *koha* (gift, donation or contribution) was offered to  
4 participants in acknowledgement of their time and as a sign of reciprocity for the information shared.  
5  
6

7  
8 Informed consent (or assent with proxy parental consent in the case of the child and adolescent  
9 participants aged under 16 years) was obtained to record, transcribe and analyse participant data. All  
10 participant information was anonymised. Participant ethnicity for both the parent/caregiver and child  
11 was confirmed at the time of the interview by using the NZ Census 2006 ethnicity question.<sup>22</sup> All  
12 interviews were audio-recorded and independently transcribed. Participants were offered their  
13 transcripts to review for accuracy and acceptability.  
14  
15  
16  
17  
18  
19

### 20 21 *Analysis*

22  
23 Interview transcripts were coded and analysed inductively in MAXQDA (2018),<sup>23</sup> according to Braun  
24 and Clarke's method for reflexive thematic analysis,<sup>24 25</sup> which aligned well with the reflexivity and  
25 awareness of researcher theoretical positioning required of research informed by Kaupapa Maori  
26 Theory. CW developed the coding matrix with peer review from EW, coded the interview data, and  
27 identified the initial themes. The authors collaborated to finalise the themes and develop the  
28 framework. The acknowledgement of different researcher standpoints allowed the authors to debate,  
29 challenge, and refine interpretations of the data, thereby developing a more nuanced interpretation of  
30 the data.<sup>25</sup> Specifically, the researchers agreed to apply the 'Give-Way' rule if there was disagreement  
31 over the interpretation of the data concerning Māori participants, with the final decision involving  
32 cultural interpretation of Māori participants' experiences passing to a Māori researcher.<sup>19 26 27</sup>  
33  
34  
35  
36  
37  
38  
39  
40  
41  
42  
43  
44

45 It became clear from our initial appraisal of the data that the degree to which participants engaged  
46 with the programme was on a continuum rather than fitting neatly into discrete categories. Therefore,  
47 the groups have been analysed together, noting where there may be key differences according to the  
48 degree of engagement.  
49  
50  
51  
52

53  
54 For more detail of this procedure, please refer to the Consolidated Criteria for Reporting Qualitative  
55 Research (COREQ) checklist (Appendix One).  
56  
57  
58  
59  
60

## Results

64 interviews were conducted (out of a potential cohort of 74) with families who had varying levels of engagement, across a six-month period from June to November 2018 (76 participants in total) (Table 1). Half of the interviews were with Māori families (families with a Māori child who had been referred to the service), including interviews with non-Māori parents of a Māori child. Participants included parents, grandparents, other caregivers, and the children/adolescents themselves (n=5) and were from a range of socioeconomic backgrounds (deciles 1-10 of the 2013 NZ Index of Deprivation).<sup>28</sup> Full details of interview recruitment rate and reasons for non-participation are included in the COREQ checklist (Appendix One).

## Demographics

Table 1. Participant demographics

|                              |                                                                       |                 |
|------------------------------|-----------------------------------------------------------------------|-----------------|
| Interview participants N     |                                                                       | 76 <sup>a</sup> |
| Female participant <i>n</i>  |                                                                       | 65              |
| Ethnicity % <sup>b</sup>     | Māori                                                                 | 32              |
|                              | NZ European                                                           | 75              |
|                              | Asian                                                                 | 7               |
|                              | Other European                                                        | 5               |
| Level of engagement <i>n</i> | Attended ≥70% of programme sessions <sup>c</sup>                      | 18              |
|                              | Attended <30% of programme sessions <sup>d</sup>                      | 19              |
|                              | Had one assessment, then discontinued with the programme <sup>e</sup> | 7               |
|                              | Referred, but chose not to engage <sup>f</sup>                        | 20              |

<sup>a</sup>64 interviews total, 11 interviews involved 2+ family members, 5 interviews included a child/adolescent participant in addition to their parent/caregiver. Maximum total of 74 potential interviews for funding and



resource reasons. 136 families approached, of which 53 were uncontactable, 7 were living out of the region, and 12 declined (see COREQ checklist for reasons); *b* Total ethnicity output (more than one ethnicity selected); *c* 24 families invited total; *d* 42 families invited total; *e* 15 families invited total; *f* 55 families invited total

### **Box 1: Key determinants of engagement and retention in Whānau Pakari**

#### **Domain 1: Adverse life stressors & socioeconomic deprivation**

‘I wouldn’t say it was, like, you guys as such – it was just the history behind what she had um, but we come from, so um I came from an abusive marriage, which had split up because of abuse... So this was really hard at the time.’

‘Once she lost her father, well that was pretty much the end of it. She just didn’t want to do nothing. As much as I tried to encourage her to, you know, get with the programme, no she just didn’t want to know about it.’

#### ***Competing health priorities***

‘...[DAUGHTER] was under [child and adolescent mental health services] for suicide watch and stuff like that... so for us there was that added stuff as well.’

#### ***Financial insecurity/socioeconomic status***

‘I didn’t have a house and lived in that camper. Yeah, so it just didn’t work out, otherwise she would have gone.’

#### **Domain 2: Societal norms of weight and body size**

##### ***Age***

‘Like, a weight problem, like, at the time he was only 6 years or 7 years.’

‘... we were kind of shocked because they said that [SON] was, like, obese or something ... I don’t think he’s overweight at all... Because he’s really tall... so I don’t understand, like, what sort of weight should he have been because he was, he’s just like a, he was like a normal kid. So I don’t understand what is

1  
2  
3  
4  
5  
6  
7  
8  
9  
10  
11  
12  
13  
14  
15  
16  
17  
18  
19  
20  
21  
22  
23  
24  
25  
26  
27  
28  
29  
30  
31  
32  
33  
34  
35  
36  
37  
38  
39  
40  
41  
42  
43  
44  
45  
46  
47  
48  
49  
50  
51  
52  
53  
54  
55  
56  
57  
58  
59  
60

overweight and underweight. Because I've seen some, not being mean, but overweight kids, and he wasn't overweight.'

### ***Gender***

'She might develop an eating disorder and I don't want that. I'd rather, you know, it's weird, but I'd rather she be overweight than underweight, you know what I mean? I'd hate to deal with an anorexic daughter because that's hard work.'

### ***Perceived genetic disposition***

'You know... it's just the way it is sometimes. Some people get good genes, some people get other genes and it means it doesn't work out.'

## **Domain 3: Historical experiences of healthcare**

### ***Weight stigma and discrimination***

'... having visited for something else entirely different and then being told kind of 'your child's obese and we are going to refer you' and just doing it front of him [...] it was just even in the way that it was delivered and I was kind of not expecting it. I mean, I can see that he's, he's a bit chunky, but I just, I don't know [...] [the referral] was a bit off-putting.'

### ***Racism***

'...people will judge you for what and where, what colour you are or whatever... [it] just made me more determined to get in there and do what I had to do.'

### **Mediator 1: Respectful, compassionate care mitigated past experiences**

'It was not just the families, but also the, what do you call them, the workers... Very supportive, non-judgmental. I think that made a big difference and 'yes we are going to go' because they are not judging you... the staff was very supportive.'

1  
2  
3 Three major interacting domains and subthemes affecting participant engagement are described in box  
4  
5 1 in participants' own words. A fourth domain of respectful, compassionate care was identified as a  
6  
7 mediator, which was able to mitigate the effect of the first three themes. Unique themes according to  
8  
9 level of engagement with the programme were not generated. While each domain was prevalent in  
10  
11 participant accounts across all recruitment categories, the extent to which a domain affected each  
12  
13 group determined engagement.  
14  
15

16 *Domain 1: Obesity sits within the context of multiple other complex stressors for families in NZ*

17  
18 Participation in the Whānau Pakari service was affected by the multiple complex stressors of living in  
19  
20 contemporary NZ. These were acute, one-off adverse events, such as a death in the family, and  
21  
22 chronic, ongoing challenges, such as financial insecurity. Childhood obesity and overweight as a  
23  
24 health concern sat within the context of multiple other important concerns for families. Participants  
25  
26 were often living in 'crisis mode' or dealing with multiple challenges at once, including: financial and  
27  
28 food insecurity, suicide, abusive relationships, deaths in the family, mental health issues, disability,  
29  
30 relocation, marriage & family break-ups, fostering children, children being raised by other caregivers,  
31  
32 drug use and significant other illnesses.  
33  
34

35  
36 For parents of children with multiple health conditions, especially mental health concerns or autism  
37  
38 spectrum disorder, addressing weight was often not perceived to be as important compared with other  
39  
40 competing family health concerns. Parents and caregivers also reported the challenges of balancing  
41  
42 multiple demands such as long work hours, shift work and extracurricular activities alongside  
43  
44 attending Whānau Pakari.  
45  
46

47 'I think he had one of his sporting things on and I was doing 50 hours a week at that time and  
48  
49 I was like 'oh, my God, I can't do it', I couldn't do it. I mean, if he needed, if I felt like he  
50  
51 needed to be there, I would get him there, like, it's, my work's not that important. Weeds and  
52  
53 shit can wait, you know, like, people can wait um if it was a, if I felt like it was serious. I  
54  
55 would have got him there, but I just yeah.'  
56  
57  
58  
59  
60

1  
2  
3 Similarly, socioeconomic deprivation and food insecurity was perceived to be a more immediate and  
4 pressing concern than childhood overweight or obesity. Both initial attendance and ongoing retention  
5 were affected by a lack of participant resources, even if participants expressed a desire to attend.  
6  
7

8  
9 Participants who engaged with Whānau Pakari and other services despite the impact of adverse  
10 stressors appeared to have more resources, and thus were less affected by this domain.  
11  
12

13  
14 *Domain 2: Societal norms of weight and body size affect how people experience seeking care for*  
15 *weight*  
16  
17

18 Societal norms and beliefs around weight and body size led to the minimisation of obesity and the fear  
19 of stigmatisation for participants (see also Domain 3). These manifested differently according to the  
20 age, gender and the perceived role of genetics in obesity, and resulted in lower engagement. An  
21 exception was participant beliefs around perceived genetic propensity towards obesity, which in some  
22 cases led to higher rather than lower participant engagement.  
23  
24  
25  
26  
27  
28

29 The age of the child involved in the service affected the degree to which families chose to engage, due  
30 to a perception that children were too young to have weight problems, which was a key reason for  
31 both dropping out of the service early or declining input altogether. Children who were clinically  
32 overweight or had obesity were perceived to be a normal weight in early childhood and increasingly  
33 beyond. Some participants felt that while their child might not fit into a set of assessment criteria, this  
34 did not necessarily equate to their child being unhealthy.  
35  
36  
37  
38  
39  
40  
41  
42

43 ‘When he got put in the [...] ‘oh, he’s overweight’ box. And when you’re, like, ‘he’s not that  
44 overweight’, because it was just he wasn’t in their little boxes. I think that more annoyed me,  
45 is that they’ve got these sort of, like, ‘this is the normal weight for a 5 year old’. Well, there’s  
46 all sorts of different 5 year olds. He’s now 10 years and he is my height [...] he’s a big guy.’  
47  
48  
49  
50  
51

52 There was a strong belief that if children were ‘big but active’, then their weight was not a concern.  
53  
54

55 ‘...he’s always been big, but he’s really active. Like he wins the triathlons and the cross-  
56 country and he bikes and swims... it’s not like he can’t exercise or is held up, you know what  
57 I mean? And so we just thought well, and it’s not like he wasn’t healthy eating.’  
58  
59  
60

1  
2  
3 Families appeared more reluctant to engage their female children in services that are characterised as  
4 weight-related, both at initial recruitment and throughout the programme, for fear of their child  
5 developing self-esteem issues. Parents also reported their daughters were often reluctant to attend  
6 themselves.  
7  
8  
9  
10

11  
12 ‘To me it’s like you don’t need to involve her because she’s already self-conscious, soft-  
13 hearted, already upset about it sort of thing and, like, to me it was like more of a trigger. So, I  
14 was, like, no. I will do it my way. So I pulled back because it wasn’t worth it for her, you  
15 know what I mean? Like, her self-esteem and stuff is worth more than, you know, going to a  
16 dietitian where at home I can just stop giving her all that stuff to make her healthier. So that’s  
17 where it comes across wrong.’  
18  
19  
20  
21  
22  
23  
24

25 Overweight and obesity was often associated with perceived genetic propensity to obesity by  
26 participants. This was sometimes specifically linked to ethnicity, and specifically that Māori and  
27 Pacific Island peoples are ‘naturally big’. A perceived familial propensity towards overweight resulted  
28 in participants reportedly acting in two ways: either they did not want to engage because they felt that  
29 there was no point, given they perceived their weight to be genetic (panel 1), or they were compelled  
30 to engage more in order to counteract their genetics:  
31  
32  
33  
34  
35  
36  
37  
38

39 ‘My side of the family is really obese so weight has always been an issue, so if you are trying to  
40 diet everyone gets behind you because they know what the challenge and the battle is. No, we  
41 don’t really care what other people say, we just get on with it.’  
42  
43  
44  
45

### 46 *Domain 3: Historical experiences of healthcare affect future perception and engagement with* 47 *services*

48  
49 Past experiences of healthcare influenced participants’ opinions, perceptions and behaviour in relation  
50 to seeking care again. This was a multidimensional phenomenon, acting across both weight and  
51 ethnicity. If participants had had negative experiences in the health system in relation to their weight  
52 or ethnicity, then they were less willing to engage with Whānau Pakari and other health services. This  
53 mostly affected participants who declined further input after their referral or who discontinued after  
54  
55  
56  
57  
58  
59  
60

1  
2  
3 one assessment. This was especially important if the referral experience to Whānau Pakari was  
4 negative, given that this may have been the first instance of being confronted about their child's  
5 weight.  
6  
7  
8  
9

10 'Basically they told her she was obese [at the B4 School Check] ... Yeah, that she was obese  
11 for her age and they said this in front of her, and she was like "what is obese"? And they said,  
12 "you're bigger than any other child your age" but she's not the only one [...] So they say it in  
13 front of a child, it sort of knocks their self-esteem and their confidence right back.'  
14  
15  
16  
17  
18

19 While weight stigma was experienced across all groups of participants, there were few feelings of  
20 stigma about attending Whānau Pakari for those participants who engaged highly ( $\geq 70\%$  of sessions):  
21  
22  
23

24 'There was nothing to be embarrassed about. You know, like secretive about it. It was  
25 something that I was doing for my kid, to help her get better in herself and if someone else  
26 had a problem then that was their problem, not mine. At the end of the day it is about her. Not  
27 about what anyone else thought.'  
28  
29  
30  
31  
32

33 Experiences of racism in the healthcare system and in wider society affected how participants  
34 reengaged with health services. This included a wide range of race-related experiences from  
35 interpersonal to institutionalised racism. Likewise, participants recounted a variety of responses to  
36 these experiences from renewal of engagement and wanting to 'prove them wrong', to disengagement  
37 with outside entities and organisations, to internalised racism.  
38  
39  
40  
41  
42  
43

44 '...we have been through so much stigmatisation that nothing more than one thing matters  
45 [...] because for us it's about the betterment of our children and our whānau [family] as a  
46 unit.'  
47  
48  
49  
50

### 51 *Mediator 1: Respectful, compassionate care mitigated past experiences*

52  
53 Conversely, positive and respectful care received in both the Whānau Pakari programme and in other  
54 areas of the health system mitigated the effect of the first three determinants, particularly against the  
55 impact of past negative experiences of healthcare. A positive referral experience generally set a  
56 positive tone for interacting with the Whānau Pakari service itself.  
57  
58  
59  
60

1  
2  
3 ‘So we decided yes, this would be an awesome programme for our daughter, because we  
4 wanted her to just have some stability at the time because she was just starting High School,  
5 going into a phase where people were judging and things like that, you know, building her  
6 self-esteem [...] It’s helped her with her confidence and just building a life that’s easy for her,  
7 you know. So, yeah, I thank [referrer] for that and for putting us onto that programme too  
8 because it was really awesome. We, as a whānau, we enjoyed it, and just being able to support  
9 her in that programme.’  
10  
11  
12  
13  
14  
15  
16  
17

18 Participants who did engage with Whānau Pakari reported that the care received in the programme  
19 was ‘different’ from previous care received and that the programme deliverers were ‘like a family’.  
20 For these families, the respectful and compassionate care countered some of the negative effects of  
21 past experiences.  
22  
23  
24  
25  
26

27 ‘It was just the people, that’s all it was. It was just the approach of the people to be honest um  
28 and that made us comfortable, and I go by my children a lot because if they’re uncomfortable  
29 well then they’re not the right people to be around for us. And they were comfortable.’  
30  
31  
32  
33

34 The social and team aspects of Whānau Pakari were beneficial for families, as well as the perceived  
35 extra care received  
36  
37  
38

39 ‘I liked it. I didn’t think I was going to. I thought ‘oh, this is going to be stupid’, but no it  
40 wasn’t. It was actually a bit of an eye opener. I actually learnt something. And then we just  
41 recently got her blood tests and all that done again because through the doctors they didn’t do  
42 no diabetic tests or anything like that. Through Whānau [Pakari] they did. They did heaps  
43 more than the doctors did. So I think that’s pretty much why we stayed with them, it was like  
44 ‘aha, we can get some serious help here’.  
45  
46  
47  
48  
49  
50  
51

52 Figure 1 summarises the interacting and mitigating domains affecting participant engagement.  
53  
54  
55  
56  
57  
58  
59  
60

## Discussion

This study found that engagement in Whānau Pakari was determined by the degree to which participants were affected by three interactive domains: complex adverse life stressors, societal norms of weight and body size, and past experiences of healthcare. These complex mechanisms operated at multiple levels including at the service, health system and wider societal levels, so that experiences at the seemingly distal societal level could still have an impact on participant engagement at the service level. While the impact of these factors was evident across all four groups, some participants appeared to be resilient to the impact of these determinants. Additionally, respectful and compassionate care appeared to act as a positive mediator. Conversely, participants who declined further input after their referral were more likely to be experiencing greater life stressors without the resources to overcome them. Participants also appeared to be affected by societal norms of weight with regards to age, gender and the perceived impact of genetics, and negative experiences of healthcare often resulted in complete disengagement.

We were surprised that clear recommendations for specific changes to internal programme aspects were not forthcoming from participants across all levels of attendance, as this was a specific intent of the project. Although factors such as the difficulty of attending programme sessions with shift work and other stressors were identified as a barrier by some participants, there was no clear consensus on factors such as timing and location. While forces external to the service affected engagement, our study indicates that there are opportunities at the service level to facilitate initial and continued engagement in Whānau Pakari, and potentially other services. Despite the negative experiences of participants in the health system (both weight and non-weight related), the care received in Whānau Pakari by deliverers was generally seen as 'different', and a key reason for wanting to continue with the service.

In our study, many participants who declined further engagement after their referral were reluctant to identify their young children as having weight issues and requiring assistance. Past research has identified multiple reasons for parental reluctance to identify overweight in their children,<sup>29</sup> including not recognising obesity as a 'disease' and therefore not warranting the same attention as other health



1  
2  
3 concerns, and wanting to avoid further stigmatising their child. Our data suggests that families are  
4 especially concerned with the mental health of their children, which was often perceived to be more  
5 important than identifying and addressing overweight and was a key reason for declining referrals.  
6  
7 There appears to be a disconnect between the focus on early life intervention due to the expected  
8 growth trajectories of young children with overweight or obesity into obesity in adolescence and  
9 adulthood,<sup>30 31</sup> and the concerns and priorities of parents with young children.  
10  
11  
12  
13  
14  
15

16 Research indicates that parents of girls with overweight or obesity are more likely to enrol them in  
17 healthy lifestyles programmes than families with boys with overweight or obesity.<sup>10</sup> The contrasting  
18 findings of our study, which also included participants who declined their referral, show clear parental  
19 concern for the mental health and self-esteem of their daughters, which may reflect a desire to focus  
20 on positive body image, self-esteem and mental health and avoid increasing body dissatisfaction.<sup>32</sup>  
21 The findings of this study would suggest that the differences in how males and females experience  
22 weight in society contributes towards the differing retention rates between male and female  
23 participants at the service level. It is concerning that two important health issues – overweight and  
24 mental health – are pitted against each other as perceived incongruent concerns, given that both are  
25 significant causes of ill-health among children and adolescents, and suboptimal health-related quality  
26 of life was identified in a previous cohort with weight issues.<sup>2</sup>  
27  
28  
29  
30  
31  
32  
33  
34  
35  
36  
37  
38  
39

40 Puhl and colleagues argue that message framing with regards to terminology is vital in childhood  
41 obesity programmes, in order to prevent further stigmatisation of families seeking help for weight.<sup>33</sup>  
42 While the Whānau Pakari *programme* aims to be non-judgemental and non-stigmatising, it is equally  
43 important that the *referral* to the service is perceived to be non-stigmatising by families in order to  
44 encourage engagement. Given the impact of the referral experience to Whānau Pakari on initial and  
45 continued engagement with the service, the referral process must be respectful and compassionate,  
46 with an acknowledgement of past instances of stigma and discrimination. The sensitivity of weight as  
47 a discussion topic requires non-judgemental language, compassion, and an acknowledgement of the  
48 wider context and potential pressures on the family.<sup>33</sup>  
49  
50  
51  
52  
53  
54  
55  
56  
57  
58  
59  
60

1  
2  
3 As in previous studies,<sup>34</sup> many participants in this study had experienced weight stigma, blame and  
4 judgement from health professionals as well as a societal culture of weight bias. Indigenous  
5 participants often experienced this in addition to varying forms of racism. The impact of racial  
6 discrimination on health care use in NZ is well-documented,<sup>35 36</sup> and the compounding impact of  
7 multiple stigmas is likely to contribute towards differential attendance rates between Māori and NZ  
8 Europeans. Previous weight bias and racism which occurs outside the service may play a role in  
9 participant reluctance to engage with Whānau Pakari. Further research should investigate the role of  
10 racism and weight stigma in engagement with healthcare for weight issues among marginalised ethnic  
11 groups.<sup>37</sup>

### 22 **Strengths and Limitations**

23  
24  
25 The strengths of this study include the large sample size across participants with varying levels of  
26 engagement which allowed for in-depth and broad analysis. In addition, this study included data from  
27 a targeted group of participants (those who declined further contact after referral) whose lack of  
28 contact with the service limits the power of quantitative methods in drawing conclusions, and who are  
29 typically difficult to recruit, as recognised in previous studies.<sup>10</sup> Finally, there was good representation  
30 from families with Māori children who comprised approximately half of the interviews, allowing us to  
31 draw conclusions for a group whose voice is historically absent from obesity research.

32  
33  
34 The main limitation of this study was the lack of child and adolescent voice with regards to their  
35 experiences with Whānau Pakari, as only five interviews included the child or adolescent as a  
36 participant. While it was intended to conduct interviews with families, many parents at recruitment  
37 were reluctant to involve their children due to the sensitivity of material discussed or were unable to  
38 involve them due to timing issues. This meant that children's experiences have mainly been explored  
39 through their parents' accounts, rather than through their own voice. In addition, previous literature  
40 has largely focused on the effect of child/adolescent gender rather than parent gender on perceived  
41 barriers to engagement.<sup>10</sup> In our study, the majority of participants were mothers or female caregivers,  
42 which may have affected the results. While this study included a range of participants from a variety  
43 of different backgrounds (table 1), it lacks specific participant demographic information such as age,

1  
2  
3 socioeconomic status and education level. Lastly, it is possible that participants were discretionary in  
4 what they chose to share; however, the disclosure of extremely personal and sensitive experiences  
5 suggests that any researcher-participant power dynamics were overcome by steps the interviewers  
6 took to mitigate this difference (see COREQ checklist).  
7  
8  
9  
10

## 11 **Conclusions**

12  
13  
14  
15 In conclusion, this study found that much of the difference between Whānau Pakari participants who  
16 engaged highly and those who did not engage appeared to be due to the degree to which participants  
17 were affected by the impact of factors at the system and societal levels. Focusing purely on weight in  
18 multicomponent interventions does not acknowledge the complexity of contemporary family life.  
19 However, family-based multidisciplinary intervention programmes such as Whānau Pakari are an  
20 opportunity to acknowledge the wider societal challenges affecting achievement of healthy lifestyle  
21 change. Health professionals and providers can engage in respectful and compassionate care to help  
22 counteract past negative experiences of healthcare. Referral pathways for healthy lifestyle change  
23 programmes need to be as flexible as possible to remove any barriers to engagement, and referrers  
24 need to develop a deeper understanding of the importance of the referral conversation in relation to  
25 weight. Future research should focus on specific strategies to facilitate engagement at different points  
26 of contact with family-based multidisciplinary healthy lifestyle services. Respectful, compassionate  
27 care is critical to enhanced retention in programmes, and ongoing engagement in healthcare services  
28 overall.  
29  
30  
31  
32  
33  
34  
35  
36  
37  
38  
39  
40  
41  
42  
43

## 44 *Acknowledgements*

45  
46  
47 The authors acknowledge Dr Donna Cormack (Te Kupenga Hauora Māori) for her contribution to the  
48 research and critical appraisal of the manuscript.  
49

50  
51  
52 Numerous authors within our research group are increasingly aware that the use of terms such as  
53 obesity are contested and increasingly problematic, partly due to the experiences of participants in  
54 terms of weight stigma. We have therefore used this term where it relates to referenced works,  
55 prevalence, and to communicate to the biomedical community, but have used alternate terms  
56  
57  
58  
59  
60

1  
2  
3 wherever possible to ensure a person-centred approach, prioritising the experience and voice of those  
4  
5 working towards achieving healthy lifestyle change  
6  
7

#### 8 *Declarations of interests*

9  
10 We have read and understood BMJ policy on declaration of interests and declare that we have no  
11  
12 competing interests. All authors have completed the Unified Competing Interest form (available on  
13  
14 request from the corresponding author) and declare: no support from any organisation for the  
15  
16 submitted work; no financial relationships with any organisations that might have an interest in the  
17  
18 submitted work in the previous three years, no other relationships or activities that could appear to  
19  
20 have influenced the submitted work.  
21  
22

#### 23 *Ethics committee approval*

24  
25 Ethical approval for the Whānau Pakari Barriers and Facilitators study was granted by Central Health  
26  
27 and Disability Ethics Committee (NZ) (17/CEN/158/AM01). Written informed consent was obtained  
28  
29 from all study participants, or informed assent with proxy parental consent in the case of the child and  
30  
31 adolescent participants aged under 16 years.  
32  
33

#### 34 *Transparency statement*

35  
36 The lead author affirms that the manuscript is an honest, accurate, and transparent account of the  
37  
38 study being reported; that no important aspects of the study have been omitted; and that any  
39  
40 discrepancies from the study as originally planned have been explained.  
41  
42

#### 43 *Contributorship statement*

44  
45 CW was involved in study design, data collection, analysis, interpretation, and writing of the  
46  
47 manuscript. NR contributed towards study design, data collection and manuscript appraisal. EW  
48  
49 contributed towards study design, oversaw analysis and interpretation, and was involved in writing of  
50  
51 the manuscript. PH was involved in study design and critical appraisal of the manuscript. YA was  
52  
53 involved in study design, analysis, interpretation, and writing of the manuscript.  
54  
55  
56  
57  
58  
59  
60

### Role of the funding source

This research was funded by A Better Start National Science Challenge and Cure Kids. The funders had no role in the conduct of the research, study design, collection, analysis and interpretation of data, in the writing of the manuscript and in the decision to submit the article for publication. The researchers are independent from the funders and all had full access to all of the data in the study and can take responsibility for the integrity of the data and the accuracy of the data analysis.

### Data sharing statement

No additional data available.

### References

1. Lakshman R, Elks CE, Ong KK. Childhood obesity. *Circulation* 2012;126(14):1770-9. doi: 10.1161/circulationaha.111.047738 [published Online First: 2012/10/03]
2. Anderson YC, Wynter LE, Treves KF, et al. Assessment of health-related quality of life and psychological well-being of children and adolescents with obesity enrolled in a New Zealand community-based intervention programme: an observational study. *BMJ Open* 2017;7(8) doi: 10.1136/bmjopen-2016-015776
3. Anderson YC, Wynter LE, Butler MS, et al. Dietary Intake and Eating Behaviours of Obese New Zealand Children and Adolescents Enrolled in a Community-Based Intervention Programme. *PLoS ONE* 2016;11(11):e0166996. doi: 10.1371/journal.pone.0166996
4. Anderson YC, Wynter LE, Grant CC, et al. Physical activity is low in obese New Zealand children and adolescents. *Sci Rep* 2017;7:41822. doi: 10.1038/srep41822
5. Anderson YC, Wynter LE, Treves KF, et al. Prevalence of comorbidities in obese New Zealand children and adolescents at enrolment in a community-based obesity programme. *J Paediatr Child Health* 2016;52(12):1099-105. doi: 10.1111/jpc.13315
6. World Health Organization. Report of the Commission on Ending Childhood Obesity. Geneva, Switzerland: World Health Organization, 2016.
7. O'Connor EA, Evans CV, Burda BU, et al. Screening for Obesity and Intervention for Weight Management in Children and Adolescents: Evidence Report and Systematic Review for the US Preventive Services Task Force. *Jama* 2017;317(23):2427-44. doi: 10.1001/jama.2017.0332 [published Online First: 2017/06/21]
8. Skelton JA, Beech BM. Attrition in paediatric weight management: a review of the literature and new directions. *Obesity reviews : an official journal of the International Association for the Study of Obesity* 2011;12(5):e273-81. doi: 10.1111/j.1467-789X.2010.00803.x [published Online First: 2010/10/01]

- 1  
2  
3 9. Swinburn BA, Sacks G, Hall KD, et al. The global obesity pandemic: shaped by global drivers and  
4 local environments. *The Lancet* 2011;378(9793):804-14. doi: 10.1016/S0140-6736(11)60813-  
5  
6 1
- 7  
8 10. Kelleher E, Davoren MP, Harrington JM, et al. Barriers and facilitators to initial and continued  
9 attendance at community-based lifestyle programmes among families of overweight and  
10 obese children: a systematic review. *Obesity reviews : an official journal of the International*  
11 *Association for the Study of Obesity* 2017;18(2):183-94. doi: 10.1111/obr.12478
- 12  
13  
14 11. Perry RA, Daniels LA, Bell L, et al. Facilitators and Barriers to the Achievement of Healthy  
15 Lifestyle Goals: Qualitative Findings From Australian Parents Enrolled in the PEACH Child  
16 Weight Management Program. *J Nutr Educ Behav* 2017;49(1):43-52.e1. doi:  
17 10.1016/j.jneb.2016.08.018
- 18  
19  
20 12. Anderson YC, Wynter LE, Moller KR, et al. The effect of a multi-disciplinary obesity  
21 intervention compared to usual practice in those ready to make lifestyle changes: design and  
22 rationale of Whānau Pakari. *BMC obesity* 2015;2:41. doi: 10.1186/s40608-015-0068-y  
23 [published Online First: 2015/10/16]
- 24  
25  
26 13. Anderson Y, Wynter L, Grant C, et al. A novel home-based intervention for child and adolescent  
27 obesity: the results of the Whānau Pakari randomized controlled trial. *Obesity*  
28 2017;25(11):1965-73.
- 29  
30  
31 14. Anderson Y, Wynter L, O'Sullivan N, et al. Two-year outcomes of Whānau Pakari, a multi-  
32 disciplinary assessment and intervention for children and adolescents with weight issues: a  
33 randomised clinical trial: *Pediatric Obesity*, 2020.
- 34  
35  
36 15. Anderson Y. Whānau Pakari: a multi-disciplinary intervention for children and adolescents with  
37 weight issues [PhD thesis]. University of Auckland, 2018.
- 38  
39  
40 16. Wild CEK, O'Sullivan NA, Lee AC, et al. Survey of Barriers and Facilitators to Engagement in a  
41 Multidisciplinary Healthy Lifestyles Program for Children. *Journal of Nutrition Education*  
42 *and Behavior* 2019 doi: 10.1016/j.jneb.2019.10.010 [published Online First: November 26,  
43 2019]
- 44  
45  
46 17. Reid P, Paine SJ, Curtis E, et al. Achieving health equity in Aotearoa: strengthening  
47 responsiveness to Maori in health research. *The New Zealand medical journal*  
48 2017;130(1465):96-103. [published Online First: 2017/11/10]
- 49  
50  
51 18. Valencia RR. The evolution of deficit thinking: Educational thought and practice: Routledge  
52 2012.
- 53  
54 19. Curtis E. Indigenous Positioning in Health Research: The importance of Kaupapa Māori theory-  
55 informed practice. *AlterNative* 2016;12(4):396-410.
- 56  
57 20. Glover M, Kira A, Johnston V, et al. A systematic review of barriers and facilitators to  
58 participation in randomized controlled trials by Indigenous people from New Zealand,  
59 Australia, Canada and the United States. *Glob Health Promot* 2014;0(0):1757.
- 60

- 1  
2  
3 21. Cole TJ. A chart to link child centiles of body mass index, weight and height. *Eur J Clin Nutr*  
4 2002;56(12):1194-99.
- 5  
6 22. Ministry of Health NZ. HISO 10001:2017 Ethnicity Data Protocols, 2017.
- 7  
8 23. MAXQDA 2018 [program]. Berlin, Germany: VERBI Software, 2018.
- 9  
10 24. Braun V, Clarke V. Using thematic analysis in psychology. *Qual Res Psychol* 2006;3(2):77-101.  
11 doi: 10.1191/1478088706qp063oa
- 12  
13 25. Braun V, Clarke V. Reflecting on reflexive thematic analysis. *Qualitative Research in Sport,*  
14 *Exercise and Health* 2019;11(4):589-97. doi: 10.1080/2159676X.2019.1628806
- 15  
16 26. Airini DBC, Elana; Johnson, Odie; Luatua, Fred, O'Shea, Mona; Rakena, Te Oti; Reynolds,  
17 Gillian; Sauni, Pale; Smith, Angie; Huirua, To'aiga Su'a; Tarawa, Matt; Ulugia-Pua, Meryl;.  
18 Success for all: Improving Māori and Pasifika student success in degree-level studies.  
19 Auckland, 2009.
- 20  
21  
22 27. Curtis ET, Wikaire E, Lualua-Aati T, et al. Tātou tātou/success for all: Improving Māori student  
23 success. Wellington: Ako Aotearoa National Centre for Tertiary Teaching Excellence, 2012.
- 24  
25 28. Atkinson J, Salmond C, Crampton P. NZDep2013 Index of Deprivation. Wellington (NZ):  
26 Department of Public Health, University of Otago, 2014.
- 27  
28 29. Towns N, D'Auria J. Parental Perceptions of Their Child's Overweight: An Integrative Review of  
29 the Literature. *Journal of Pediatric Nursing* 2009;24(2):115-30. doi:  
30 <https://doi.org/10.1016/j.pedn.2008.02.032>
- 31  
32  
33 30. Geserick M, Vogel M, Gausche R, et al. Acceleration of BMI in Early Childhood and Risk of  
34 Sustained Obesity. *New England Journal of Medicine* 2018;379(14):1303-12. doi:  
35 10.1056/NEJMoa1803527
- 36  
37  
38 31. Childhood Obesity Plan Wellington: Ministry of Health, New Zealand; [updated 24 April 2019;  
39 cited 2019 12 November 2019]. Available from: [https://www.health.govt.nz/our-](https://www.health.govt.nz/our-work/diseases-and-conditions/obesity/childhood-obesity-plan)  
40 [work/diseases-and-conditions/obesity/childhood-obesity-plan](https://www.health.govt.nz/our-work/diseases-and-conditions/obesity/childhood-obesity-plan).
- 41  
42  
43 32. Puhl R, Brownell KD. Bias, Discrimination, and Obesity. *Obesity Research* 2001;9(12):788-805.  
44 doi: 10.1038/oby.2001.108
- 45  
46 33. Puhl RM, Latner JD. Stigma, obesity, and the health of the nation's children. *Psychological*  
47 *bulletin* 2007;133(4):557-80. doi: 10.1037/0033-2909.133.4.557 [published Online First:  
48 2007/06/27]
- 49  
50  
51 34. Smith KL, Straker LM, McManus A, et al. Barriers and enablers for participation in healthy  
52 lifestyle programs by adolescents who are overweight: a qualitative study of the opinions of  
53 adolescents, their parents and community stakeholders. *BMC Pediatrics* 2014;14(1):53. doi:  
54 10.1186/1471-2431-14-53
- 55  
56  
57 35. Harris RB, Cormack DM, Stanley J. Experience of racism and associations with unmet need and  
58 healthcare satisfaction: the 2011/12 adult New Zealand Health Survey. *Aust N Z J Public*  
59  
60

1  
2  
3 *Health* 2019;43(1):75-80. doi: 10.1111/1753-6405.12835 [published Online First:  
4 2018/10/09]  
5

- 6 36. Harris R, Cormack D, Tobias M, et al. The pervasive effects of racism: experiences of racial  
7 discrimination in New Zealand over time and associations with multiple health domains.  
8 *Social science & medicine (1982)* 2012;74(3):408-15. doi: 10.1016/j.socscimed.2011.11.004  
9 [published Online First: 2011/12/30]  
10  
11 37. Wild CE, Rawiri N, Willing EJ, et al. What affects programme engagement for Māori families? A  
12 qualitative study of a family-based, multidisciplinary healthy lifestyle programme for children  
13 and adolescents. Forthcoming 2020  
14  
15  
16  
17  
18  
19  
20  
21

22 Figure One: The three interacting factors that influence participant engagement in Whānau Pakari.  
23 Respectful, compassionate care can partially mitigate the effects of these determinants.  
24  
25  
26  
27  
28  
29  
30  
31  
32  
33  
34  
35  
36  
37  
38  
39  
40  
41  
42  
43  
44  
45  
46  
47  
48  
49  
50  
51  
52  
53  
54  
55  
56  
57  
58  
59  
60





## COREQ (Consolidated criteria for reporting qualitative research)

This checklist is intended to supplement the manuscript by providing further detail on methodology.

### Domain 1: Research team and reflexivity

#### *Personal characteristics*

##### 1. Interviewers

Cervantée Wild & Ngauru Rawriri conducted the interviews (page 8).

##### 2. Credentials and 3. Occupation (page 1)

Cervantée Wild (BHSc(Hons), BA) – PhD candidate, Liggins Institute, University of Auckland

Ngauru Rawiri – BHSc student, Te Reo Māori teacher (tertiary level) and interview facilitator, Liggins Institute, University of Auckland

Paul Hofman (MbChB, Dip Obs, FRACP) – Professor and paediatric endocrinologist

Esther Willing (PhD) – Lecturer in Hauora Māori, Kōhatu – Centre for Hauora Māori, University of Otago

Yvonne Anderson (PhD, Dip Paeds, MBChB, FRACP, BSc [Psych]) – Senior research fellow and paediatrician

##### 4. Gender & ethnicity

CW – female, New Zealand European

NR – female, Māori (Ngāti Mutunga, Ngāti Tama, Ngāti Rāhiri o Te Ati Awa me Ngai Tūhoe)

PH – male, New Zealand European

EW – female, Māori (Ngāti Toarangatira, Ngāti Koata me Ngā Ruahine)

YA – female, New Zealand European

##### 5. Experience and training

CW had qualitative research training through the PhD (supervised by PH, EW, and YA). NR had interview experience through her career. PH is an experienced researcher in child health and endocrinology. EW is an experienced qualitative researcher and has extensive experience in Māori health research. YA is an experienced researcher in child health, especially childhood obesity.

#### *Relationship with participants*

## 6. Relationship established

All participants were recruited as described below, and some were already known to NR through relationship networks.

## 7. Participant knowledge of the interviewer

The participants knew the reasons for conducting the research (detailed in the patient information and consent form), and participants were aware that the study would specifically ask about the factors that contributed to their decisions to engage or not engage, in order to improve the service. Participants were also aware that the interviewers were separate and distinct from the clinical service team.

## 8. Interviewer characteristics

NR is a Māori researcher (of Ngāti Mutunga, Ngāti Tama, Ngāti Rāhiri o Te Ati Awa and Ngai Tūhoe descent) and CW is New Zealand European. This mixed Indigenous – non-Indigenous partnership allowed us to connect and establish rapport with participants, depending on the interview participant and context. NR's role as a parent had the advantage that familiarity with this stage of life helped her understand participants' stories and ask exploratory questions.

## Domain 2: Study design

### *Theoretical framework*

## 9. Methodological orientation and Theory

The research approach was informed by Kaupapa Māori theory. The approach was developed to minimise any perceived power imbalances between the interview team and the participants and make the interview experience as comfortable as possible. We used thematic analysis to analyse the interviews (page 7).

### *Participant selection*

## 10. Sampling and 11. Method of approach

We identified eligible potential participants who fit the criteria, and then stratified these participants into groups by engagement level and ethnicity. We then randomised the list of potential participants in each group, and then contacted each participant one by one (stratified random sampling). Participants were recruited by telephone and interviewed in person over a six-month period from June to December 2018 (page 8).

## 12. Sample size

For funding and resource reasons, we had a maximum total of 74 potential interviews with families. We conducted 64 interviews in total (page 10).

## 13. Non-participation

We approached 136 families, of which 53 were uncontactable, 7 agreed but were unable to be interviewed as they had moved out of the region, and 12 declined because they were not interested, were too busy with work, or did not remember the referral (page 11).

### *Setting*

1  
2  
3 14. Setting of data collection  
4

5 Participants were interviewed in person at their home, workplace, or at a local community child  
6 health centre. All participants chose where they would prefer to be interviewed (page 8).  
7

8 15. Presence of non-participants  
9

10 For most interviews, only the participant and interviewers were present, but there were occasionally  
11 other family members present, such as young children (<5 years) (page 8-9)  
12

13 16. Description of sample  
14

15 Half the interviews were with families with Māori children. Most (80%) were solely with a female  
16 parent/caregiver (13 interviews included male parents and/or caregivers). 11 interviews involved  
17 two or more family members. 5 interviews included a child participant (page 10).  
18

19 *Data collection*  
20

21 17. Interview guide  
22

23 A semi-structured interview framework was used and adjusted for relevance as each interview  
24 progressed. It was not pilot tested. The guide has been included as supplementary material.  
25

26 18. Repeat interviews  
27

28 Repeat interviews were not conducted, but participants were offered their transcripts for review  
29 after the interview (page 9).  
30

31 19. Audio recording  
32

33 Interviews were audiotaped digitally and transcribed by a medical typist (page 9).  
34

35 20. Field notes  
36

37 Field notes were made after each interview and kept as part of a reflexive notes.  
38

39 21. Duration  
40

41 Interview audio recordings ranged from nine minutes to 107 minutes (mean 31 minutes).  
42

43 22. Data saturation  
44

45 Data saturation was reached in each group of participants in each level of engagement.  
46

47 23. Transcripts returned  
48

49 Transcripts were anonymised and returned to the participant for checking, including deletions of  
50 portions if desired (page 9).  
51

52  
53 **Domain 3: analysis and findings**  
54

55 *Data analysis*  
56

57 24. Number of data coders  
58  
59  
60

1  
2  
3 Eight transcripts were independently coded by CW and EW and discussed for consistency. After the  
4 coding matrix was constructed and consensus on codes reached, all transcripts were coded again by  
5 CW.  
6

#### 7 25. Description of the coding tree

8  
9 A 'mind map' was used instead of a coding tree in order to better capture complexity and avoid an  
10 artificial hierarchy that did not adequately represent the inter-relationships between the themes,  
11 since themes could become more major or minor depending on the context.  
12

#### 13 26. Derivation of themes

14  
15 Themes were derived from the data according to Braun and Clarke's 2006 and 2019 method for  
16 reflexive thematic analysis (page 9).  
17

#### 18 27. Software

19  
20 MAXQDA software was used to manage the data (page 9).  
21

#### 22 28. Participant checking

23  
24 Participants did not provide feedback on the findings.  
25  
26  
27

### 28 *Reporting*

#### 29 29. Quotations presented

30  
31 Participant quotations are presented in Panel 1 and throughout the manuscript. They are not  
32 identified by participant number (page 11-12).  
33  
34

#### 35 30. Data and findings consistent

36  
37 There was good consistency between data and findings, with the two interviewers working to  
38 discuss findings and the wider research team providing critique and challenging interpretations of  
39 data (page 9).  
40

#### 41 31. and 32. Clarity of major and minor themes

42  
43 A distinction was made between 'major' and 'minor' themes with sub-themes capturing the range of  
44 participant experiences under each major theme. However, even major themes could not be cleanly  
45 separated, reflecting real-world complexity.  
46  
47  
48

49 Reference: Tong A, Sainsbury P, Craig J. Consolidated criteria for reporting qualitative research  
50 (COREQ): a 32-item checklist for interviews and focus groups. *Int J Qual Health Care* 2007; 19, 349–  
51 357. doi: 10.1093/intqhc/mzm042  
52

53 NB. This checklist has been amended to capture ethnicity and gender breakdown, to reflect the  
54 composition of the research team.  
55  
56  
57  
58  
59  
60

## SUPPLEMENTARY MATERIAL: Interview schedule

*NB. Interviews were semi-structured and this schedule is simply a guide to the line of interview questioning. Not all questions were asked if not appropriate. Sections marked with an asterisk (\*) were not asked of participants who declined involvement in the programme.*

### Referral & initial thoughts

- Who referred you to Whānau Pakari?
- Do you remember how they told you about the programme? *(if not self-referral)*
- Did they talk with you and your child?
- How did you feel about being referred? How did you talk to your child/children about the programme and referral?
- Why did you decide to accept the referral?
- How did you feel about starting the programme?
- Which part of the programme (if any) were you more interested in, or seemed more relevant for you and/or your family?
- Were you worried about what other people might think about you and your family attending Whānau Pakari?

### Overall experience \*

- Which parts of the programme were the most helpful?
- Which parts of the programme did you find were more difficult?
- Did Whānau Pakari meet your needs in supporting you to make healthy lifestyle changes as a family? Why/why not?
- Did Whānau Pakari meet your expectations in terms of what you thought the team would provide? How did/didn't they do this?
- Would you recommend Whānau Pakari to other families and why/why not?

### Barriers and facilitators \*

- What were the things that helped you to or made you want to continue to attend Whānau Pakari sessions, if any?
- What were the things that made it hard for you to continue to attend Whānau Pakari, if any?
- Did you experience any travel barriers to get to the sessions? E.g. location, access to car, parking, petrol, WOF, rego
- The Healthy Lifestyles Coordinator came to you for the assessments. What were the good things about a home visit? (If any) What were the negative things? (If any)
- Do you prefer home-based assessments rather than coming to the hospital/clinic?
- Were you able to involve the rest of your children and family in the programme sessions.

- How much of a priority was Whānau Pakari in relation to your other demands?
- How did other competing demands, obligations or choices impact on your decision to attend Whānau Pakari?
- Can you please describe how Whānau Pakari was (or wasn't) suitable for families like yours?
- Was Whānau Pakari family-friendly, inviting, comfortable? What could be done to improve this?
- Can you please tell me how costs may or may not have been barriers to participation in Whānau Pakari? How?
- Can you tell me about any other barriers to participation in Whānau Pakari that you experienced?
- Can you think of things that might have motivated you or your whānau to participate (or things that kept you from participating)?

### **Beliefs and feelings around healthy lifestyle programmes**

- What do you think about healthy lifestyle programmes in general?

### **Previous experiences with health system**

- In general, can you describe what your experiences with the health system have been like prior to the Whānau Pakari programme?
- Have you ever felt that you or your family have been treated unfairly in the health system? If yes, why do you think that this happened?
- In your experiences with the health system, have you ever experienced discrimination? If yes, can you tell me a bit more about this? Why do you think this happened?
- Have any of you or your family's previous experiences with the health system influenced your decision to attend Whānau Pakari? If yes, how?
- Have you had any previous negative experiences with health providers that made you choose not to attend Whānau Pakari sessions?

### **Previous experiences with societal stigma**

- In your day-to-day life, have you ever been treated unfairly or discriminated against? If yes, can you tell me a bit more about this? Why do you think this happened?
- Have you ever witnessed or heard about other members of your whānau being treated unfairly or discriminated against for any reason? If yes, can you tell me a bit more about this?
- Do you think any of these experiences influenced your decisions or ability to attend, engage, participate or continue participation in Whānau Pakari?

### Follow-up prompt guidelines

Prompts are to keep the momentum of the interview by being positive, affirming answers and using active listening without being leading.

- Prompts included:
  - Non-verbal nods
  - Affirming sounds e.g. Mmmm
  - Agreement e.g. yes, that's interesting
  - Questions e.g. "what did you mean by that?", repeat the last word the participant said as a question to prompt more explanation.
  - To get back on track: "Could I ask you about something you said before..."

For peer review only
